# Supplementary material for: Development of a Robust Control Strategy for Fixed-Dose Combination Bilayer Tablets with Integrated Quality by Design, Statistical, and Process Analytical Technology Approach
Source: MDPI journal article supplement (doi:10.3390/pharmaceutics13091443), 2021-09-10
Supplement: s1 [file s1]

Supplementary Material

# Development of a Robust Control Strategy for Fixed-Dose Combination Bilayer Tablets with Integrated Quality by Design, Statistical, and Process Analytical Technology Approach

Myung-Hee Chun <sup>1</sup>, Ji Yeon Kim <sup>2</sup>, Eun-Seok Park <sup>1,\*</sup> and Du Hyung Choi <sup>2,\*</sup>

**Table S1.** Initial risk assessment of metformin HCl layer. MAs, material attributes; PPs, process parameters.

| MAs and PPs      | CQAs               | S | P | D | RPN | Risk Degree | Justification                                                                                                                                                                                                                                                                                                                                                                                     |
|------------------|--------------------|---|---|---|-----|-------------|---------------------------------------------------------------------------------------------------------------------------------------------------------------------------------------------------------------------------------------------------------------------------------------------------------------------------------------------------------------------------------------------------|
| Calcium silicate | Assay              | 2 | 1 | 4 | 8   | Low         | Calcium silicate is considered a low risk for assay and content uniformity due to its low ratio in the metformin HCl layer.                                                                                                                                                                                                                                                                       |
|                  | Content uniformity | 2 | 1 | 4 | 8   | Low         |                                                                                                                                                                                                                                                                                                                                                                                                   |
|                  | Dissolution        | 5 | 4 | 4 | 80  | High        | Calcium silicate has characteristics of high physical water absorption and highly porous structure which affect the drug release. Thus, calcium silicate might significantly affect dissolution.                                                                                                                                                                                                  |
|                  | Hardness           | 1 | 1 | 2 | 2   | Low         | Calcium silicate is considered a low risk for hardness and friability due to its low ratio in the metformin HCl layer.                                                                                                                                                                                                                                                                            |
|                  | Friability         | 1 | 1 | 2 | 2   | Low         |                                                                                                                                                                                                                                                                                                                                                                                                   |
| HPMC binder      | Assay              | 2 | 1 | 4 | 8   | Low         | HPMC binder is considered a low risk for assay and content uniformity due to its low ratio in the metformin HCl layer.                                                                                                                                                                                                                                                                            |
|                  | Content uniformity | 2 | 1 | 4 | 8   | Low         |                                                                                                                                                                                                                                                                                                                                                                                                   |
|                  | Dissolution        | 5 | 4 | 4 | 80  | High        | HPMC has the properties of being dissolved in water and forming a gel layer; therefore, it controls the drug release rate by protecting the disintegration of the matrix. Thus, the HPMC binder might significantly affect dissolution.                                                                                                                                                           |
|                  | Hardness           | 4 | 3 | 2 | 24  | Medium      | Tablet hardness is primarily affected by the moisture content of the granules. As the moisture content of the granules increases, the pores between the particles decrease, and the density increases, resulting in a harder tablet. HPMC, an excipient used as a binder in granulation, is hydrophilic and absorbs water on contact. Thus, the HPMC binder might affect hardness and friability. |
|                  | Friability         | 4 | 3 | 2 | 24  | Medium      |                                                                                                                                                                                                                                                                                                                                                                                                   |
| HPMC             | Assay              | 4 | 3 | 4 | 48  | High        | HPMC is considered high risk for assay and content uniformity due to its high ratio in the metformin HCl layer                                                                                                                                                                                                                                                                                    |
|                  | Content uniformity | 4 | 3 | 4 | 48  | High        |                                                                                                                                                                                                                                                                                                                                                                                                   |
|                  | Dissolution        | 5 | 4 | 4 | 80  | High        | HPMC has the properties of being dissolved in water and forming a gel layer; therefore, it controls the drug release rate by protecting the disintegration of the matrix. Thus, the HPMC binder might significantly affect dissolution.                                                                                                                                                           |
|                  | Hardness           | 4 | 3 | 2 | 24  | Medium      | Due to HPMC properties such as absorbing water, the tablet hardness can be affected. Thus, the HPMC might affect hardness and friability.                                                                                                                                                                                                                                                         |
|                  | Friability         | 4 | 3 | 2 | 24  | Medium      |                                                                                                                                                                                                                                                                                                                                                                                                   |
| St-Mg            | Assay              | 2 | 1 | 4 | 8   | Low         | Magnesium stearate is considered to have a negligible effect on the assay, content uniformity, dissolution, hardness, and                                                                                                                                                                                                                                                                         |

|                           |                    |   |   |   |     |        |                                                                                                                                                                                                                                                                                                                                                                                                                            |
|---------------------------|--------------------|---|---|---|-----|--------|----------------------------------------------------------------------------------------------------------------------------------------------------------------------------------------------------------------------------------------------------------------------------------------------------------------------------------------------------------------------------------------------------------------------------|
|                           |                    |   |   |   |     |        | friability. This is because of magnesium stearate's low ratio in the metformin HCl layer. Therefore, magnesium stearate poses a low risk to the assay, content uniformity, dissolution, hardness, and friability.                                                                                                                                                                                                          |
|                           | Content uniformity | 2 | 1 | 4 | 8   | Low    |                                                                                                                                                                                                                                                                                                                                                                                                                            |
|                           | Dissolution        | 2 | 1 | 4 | 8   | Low    |                                                                                                                                                                                                                                                                                                                                                                                                                            |
|                           | Hardness           | 1 | 1 | 2 | 2   | Low    |                                                                                                                                                                                                                                                                                                                                                                                                                            |
|                           | Friability         | 1 | 1 | 2 | 2   | Low    |                                                                                                                                                                                                                                                                                                                                                                                                                            |
| Binder solvent spray rate | Assay              | 3 | 3 | 4 | 36  | Medium | While the spray rate could affect CQAs, it was not considered as a CPP because it was used as a fixed value in the process.                                                                                                                                                                                                                                                                                                |
|                           | Content uniformity | 3 | 3 | 4 | 36  | Medium |                                                                                                                                                                                                                                                                                                                                                                                                                            |
|                           | Dissolution        | 3 | 3 | 4 | 36  | Medium |                                                                                                                                                                                                                                                                                                                                                                                                                            |
|                           | Hardness           | 4 | 3 | 2 | 24  | Medium |                                                                                                                                                                                                                                                                                                                                                                                                                            |
|                           | Friability         | 4 | 3 | 2 | 24  | Medium |                                                                                                                                                                                                                                                                                                                                                                                                                            |
| Binder solvent amount     | Assay              | 3 | 3 | 4 | 36  | Medium | A large amount of liquid binder could increase the residence time and torque value and produces spherical granules since the liquid bridges form between particles. In addition, the ratio of the liquid binder might affect granule porosity and size. The shape and size of the granule affect assay and content uniformity.                                                                                             |
|                           | Content uniformity | 3 | 3 | 4 | 36  | Medium |                                                                                                                                                                                                                                                                                                                                                                                                                            |
|                           | Dissolution        | 5 | 5 | 4 | 100 | High   | Binder solvent amount affects the granule size, which is related to the drug release. Smaller granules which have large surface area are released faster than larger granules because they have a larger water contact area. Thus, binder solvent amount might significantly affect dissolution.                                                                                                                           |
|                           | Hardness           | 4 | 3 | 2 | 24  | Medium | Binder solvent amount affects the granule size and granule shape, which influence the hardness and friability. Thus, binder solvent amount might affect hardness and friability.                                                                                                                                                                                                                                           |
|                           | Friability         | 4 | 3 | 2 | 24  | Medium |                                                                                                                                                                                                                                                                                                                                                                                                                            |
| Impeller speed            | Assay              | 3 | 3 | 4 | 36  | Medium | Insufficient impeller speed can lead to insufficient granule formation and cause undesirable porosity and loss of granule strength. Higher impeller speed applies a high shear between the particles, which results in the continuous production of granules, leading to higher density. These granule properties affect the assay and content uniformity. Thus, impeller speed might affect assay and content uniformity. |
|                           | Content uniformity | 3 | 3 | 4 | 36  | Medium |                                                                                                                                                                                                                                                                                                                                                                                                                            |
|                           | Dissolution        | 5 | 5 | 4 | 100 | High   | Impeller speed affects the granule size, which is related to the drug release. Smaller granules which have large surface area are released faster than larger granules because they have a larger water contact area.                                                                                                                                                                                                      |
|                           | Hardness           | 4 | 3 | 2 | 24  | Medium | Impeller speed affects granule properties such as size and density. These properties affect hardness and friability. Thus, impeller speed might affect hardness and friability.                                                                                                                                                                                                                                            |
|                           | Friability         | 4 | 3 | 2 | 24  | Medium |                                                                                                                                                                                                                                                                                                                                                                                                                            |
| Massing time              | Assay              | 3 | 3 | 4 | 36  | Medium | Improper massing time produces granules that have a weak and undesired density. Additionally, longer massing times cause granule growth and densification by generating high                                                                                                                                                                                                                                               |

|                    |                    |   |   |   |     |        |                                                                                                                                                                                                                                                                                |
|--------------------|--------------------|---|---|---|-----|--------|--------------------------------------------------------------------------------------------------------------------------------------------------------------------------------------------------------------------------------------------------------------------------------|
|                    | Content uniformity | 3 | 3 | 4 | 36  | Medium | shear between the particles. These granule properties affect the tablet properties. Thus, massing time might affect assay and content uniformity.                                                                                                                              |
|                    | Dissolution        | 5 | 5 | 4 | 100 | High   | Massing time affects the granule size, which is related to the drug release. Smaller granules which have large surface area are released faster than larger granules because they have a larger water contact area. Thus, massing time might significantly affect dissolution. |
|                    | Hardness           | 4 | 3 | 2 | 24  | Medium | Massing time affects the granule properties such as size and density. These properties affect hardness and friability. Thus, massing time might affect hardness and friability.                                                                                                |
|                    | Friability         | 4 | 3 | 2 | 24  | Medium |                                                                                                                                                                                                                                                                                |
| Drying temperature | Assay              | 1 | 3 | 4 | 12  | Low    | Drying temperature was used as a fixed value based on previous experience; therefore, it was not considered as a CPP.                                                                                                                                                          |
|                    | Content uniformity | 1 | 3 | 4 | 12  | Low    |                                                                                                                                                                                                                                                                                |
|                    | Dissolution        | 1 | 3 | 4 | 12  | Low    |                                                                                                                                                                                                                                                                                |
|                    | Hardness           | 1 | 3 | 2 | 6   | Low    |                                                                                                                                                                                                                                                                                |
|                    | Friability         | 1 | 3 | 2 | 6   | Low    |                                                                                                                                                                                                                                                                                |
| Drying time        | Assay              | 1 | 3 | 4 | 12  | Low    | Drying time was used as a fixed value based on previous experience; therefore, it was not considered as a CPP.                                                                                                                                                                 |
|                    | Content uniformity | 1 | 3 | 4 | 12  | Low    |                                                                                                                                                                                                                                                                                |
|                    | Dissolution        | 1 | 3 | 4 | 12  | Low    |                                                                                                                                                                                                                                                                                |
|                    | Hardness           | 1 | 3 | 2 | 6   | Low    |                                                                                                                                                                                                                                                                                |
|                    | Friability         | 1 | 3 | 2 | 6   | Low    |                                                                                                                                                                                                                                                                                |

| Risk Degree | RPN    | Justification                                                                        |
|-------------|--------|--------------------------------------------------------------------------------------|
| Low         | 1–19   | The risk is widely acceptable, and further investigation is not necessary.           |
| Medium      | 20–39  | The risk is acceptable, but further investigation to reduce the risk is recommended. |
| High        | 40–125 | The risk is unacceptable, and further investigation to reduce the risk is required.  |

**Table S2.** Initial risk assessment of dapagliflozin L-proline layer. MAs, material attributes; PPs, process parameters.

| MAs and PPs | CQAs               | S | P | D | RPN | Risk Degree | Justification                                                                                                                                                                                       |
|-------------|--------------------|---|---|---|-----|-------------|-----------------------------------------------------------------------------------------------------------------------------------------------------------------------------------------------------|
| MCC         | Assay              | 4 | 3 | 4 | 48  | High        | MCC is considered high risk for assay and content uniformity due to its high ratio in the dapagliflozin L-proline layer.                                                                            |
|             | Content uniformity | 4 | 3 | 4 | 48  | High        |                                                                                                                                                                                                     |
|             | Dissolution        | 5 | 4 | 4 | 80  | High        | An MCC that has a porous structure can improve the drug release rate. For this reason, the MCC can have a considerable effect on dissolution. Thus, the MCC might significantly affect dissolution. |
|             | Hardness           | 4 | 3 | 2 | 24  | Medium      | The MCC improves compactibility; thus, it has a noticeable effect on hardness and friability. Thus, the MCC might affect hardness and friability.                                                   |
|             | Friability         | 4 | 3 | 2 | 24  | Medium      |                                                                                                                                                                                                     |
| Lactose     | Assay              | 2 | 1 | 4 | 8   | Low         | Lactose is considered low risk for assay and content uniformity due to its low ratio in the dapagliflozin L-proline layer.                                                                          |
|             | Content uniformity | 2 | 1 | 4 | 8   | Low         |                                                                                                                                                                                                     |
|             | Dissolution        | 5 | 5 | 4 | 100 | High        | Since lactose has the property of absorbing water, drug disintegration is affected. Thus, lactose might significantly affect dissolution.                                                           |
|             | Hardness           | 4 | 3 | 2 | 24  | Medium      | Since lactose is not critical for the combination of granules and tablets, the risk of hardness and friability is medium.                                                                           |
|             | Friability         | 4 | 3 | 2 | 24  | Medium      |                                                                                                                                                                                                     |
| L-HPC       | Assay              | 2 | 1 | 4 | 8   | Low         | L-HPC is considered low risk for assay and content uniformity due to its low ratio in the dapagliflozin L-proline layer.                                                                            |
|             | Content uniformity | 2 | 1 | 4 | 8   | Low         |                                                                                                                                                                                                     |

|                  |                    |   |   |   |     |        |                                                                                                                                                                                                                                                                                                                                                         |
|------------------|--------------------|---|---|---|-----|--------|---------------------------------------------------------------------------------------------------------------------------------------------------------------------------------------------------------------------------------------------------------------------------------------------------------------------------------------------------------|
|                  | Dissolution        | 5 | 5 | 4 | 100 | High   | L-HPC is highly affected by water absorption. Thus, L-HPC might significantly affect dissolution.                                                                                                                                                                                                                                                       |
|                  | Hardness           | 4 | 3 | 2 | 24  | Medium | L-HPC is used as a disintegrant, and it has a medium risk to tablet hardness and friability.                                                                                                                                                                                                                                                            |
|                  | Friability         | 4 | 3 | 2 | 24  | Medium |                                                                                                                                                                                                                                                                                                                                                         |
| Silicon-dioxide  | Assay              | 2 | 1 | 4 | 8   | Low    | Silicon dioxide is considered to have a negligible effect on the assay, content uniformity, dissolution, hardness, and friability. This is because of the silicon dioxide low ratio in the dapagliflozin L-proline layer. Therefore, silicon dioxide poses a low risk to the assay, content uniformity, dissolution, hardness, and friability.          |
|                  | Content uniformity | 2 | 1 | 4 | 8   | Low    |                                                                                                                                                                                                                                                                                                                                                         |
|                  | Dissolution        | 2 | 1 | 4 | 8   | Low    |                                                                                                                                                                                                                                                                                                                                                         |
|                  | Hardness           | 1 | 1 | 2 | 2   | Low    |                                                                                                                                                                                                                                                                                                                                                         |
|                  | Friability         | 1 | 1 | 2 | 2   | Low    |                                                                                                                                                                                                                                                                                                                                                         |
| St-Mg            | Assay              | 2 | 1 | 4 | 8   | Low    | Magnesium stearate is considered to have a negligible effect on the assay, content uniformity, dissolution, hardness, and friability. This is because of the magnesium stearate low ratio in the dapagliflozin L-proline layer. Therefore, magnesium stearate poses a low risk to the assay, content uniformity, dissolution, hardness, and friability. |
|                  | Content uniformity | 2 | 1 | 4 | 8   | Low    |                                                                                                                                                                                                                                                                                                                                                         |
|                  | Dissolution        | 2 | 1 | 4 | 8   | Low    |                                                                                                                                                                                                                                                                                                                                                         |
|                  | Hardness           | 1 | 1 | 2 | 2   | Low    |                                                                                                                                                                                                                                                                                                                                                         |
|                  | Friability         | 1 | 1 | 2 | 2   | Low    |                                                                                                                                                                                                                                                                                                                                                         |
| Feed screw speed | Assay              | 2 | 1 | 4 | 8   | Low    | The feed screw speed can affect the properties of the granules. However, it was used as a fixed value based on previous experience; therefore, it was not considered as a CPP.                                                                                                                                                                          |
|                  | Content uniformity | 2 | 1 | 4 | 8   | Low    |                                                                                                                                                                                                                                                                                                                                                         |
|                  | Dissolution        | 3 | 3 | 4 | 36  | Medium |                                                                                                                                                                                                                                                                                                                                                         |
|                  | Hardness           | 2 | 1 | 2 | 4   | Low    |                                                                                                                                                                                                                                                                                                                                                         |
|                  | Friability         | 2 | 1 | 2 | 4   | Low    |                                                                                                                                                                                                                                                                                                                                                         |
| Roller pressure  | Assay              | 3 | 3 | 4 | 36  | Medium | Roller pressure affects the granule properties such as granule strength. Thus, roller pressure might affect assay and content uniformity.                                                                                                                                                                                                               |
|                  | Content uniformity | 3 | 3 | 4 | 36  | Medium |                                                                                                                                                                                                                                                                                                                                                         |
|                  | Dissolution        | 5 | 5 | 4 | 100 | High   | Roller pressure affects the granule strength, which is related to drug release. Thus, roller pressure might significantly affect dissolution.                                                                                                                                                                                                           |
|                  | Hardness           | 5 | 4 | 2 | 40  | High   | The roller pressure determines the cohesion of the powder that is directly related to the ribbon density. Ribbon density affects granule strength, which may affect tablet properties such as hardness and friability. Thus, roller pressure might significantly affect hardness and friability.                                                        |
|                  | Friability         | 5 | 4 | 2 | 40  | High   |                                                                                                                                                                                                                                                                                                                                                         |
| Roller speed     | Assay              | 2 | 1 | 4 | 8   | Low    | Roller speed determines the throughput of the process and might affect CQAs; however, it was used as a fixed value based on previous experience and not considered as a CPP.                                                                                                                                                                            |
|                  | Content uniformity | 2 | 1 | 4 | 8   | Low    |                                                                                                                                                                                                                                                                                                                                                         |
|                  | Dissolution        | 3 | 3 | 4 | 36  | Medium |                                                                                                                                                                                                                                                                                                                                                         |
|                  | Hardness           | 1 | 3 | 2 | 6   | Low    |                                                                                                                                                                                                                                                                                                                                                         |
|                  | Friability         | 1 | 3 | 2 | 6   | Low    |                                                                                                                                                                                                                                                                                                                                                         |
| Roller gap       | Assay              | 3 | 2 | 4 | 24  | Medium | The roller gap affects the granule properties such as granule strength. Thus, roller gap might affect assay and content uniformity.                                                                                                                                                                                                                     |
|                  | Content uniformity | 3 | 2 | 4 | 24  | Medium |                                                                                                                                                                                                                                                                                                                                                         |
|                  | Dissolution        | 5 | 5 | 4 | 100 | High   | The roller gap affects the granule properties such as granule strength, which is related to drug release. Thus, the roller gap might significantly affect dissolution.                                                                                                                                                                                  |
|                  | Hardness           | 5 | 4 | 2 | 40  | High   | The gap between the rolls determines the thickness of the ribbon and is related to the granule strength. These granule properties affect the hardness and friability. Thus, the roller gap might significantly affect hardness and friability.                                                                                                          |
|                  | Friability         | 5 | 4 | 2 | 40  | High   |                                                                                                                                                                                                                                                                                                                                                         |
| Mill screen type | Assay              | 2 | 1 | 4 | 8   | Low    | The mill screen type can affect the properties of the granules;                                                                                                                                                                                                                                                                                         |

|                                  |                    |   |   |   |     |        |                                                                                                                                                                                                                                                                                          |
|----------------------------------|--------------------|---|---|---|-----|--------|------------------------------------------------------------------------------------------------------------------------------------------------------------------------------------------------------------------------------------------------------------------------------------------|
|                                  | Content uniformity | 2 | 1 | 4 | 8   | Low    | however, generally, the mill screen type does not change significantly and, hence, does not significantly affect the CQAs. Thus, it was not considered as a CPP.                                                                                                                         |
|                                  | Dissolution        | 2 | 3 | 4 | 24  | Medium |                                                                                                                                                                                                                                                                                          |
|                                  | Hardness           | 1 | 3 | 2 | 6   | Low    |                                                                                                                                                                                                                                                                                          |
|                                  | Friability         | 1 | 3 | 2 | 6   | Low    |                                                                                                                                                                                                                                                                                          |
| Mill speed                       | Assay              | 2 | 1 | 4 | 8   | Low    | The mill speed can affect the properties of the granules. However, it was used as a fixed value based on previous experience; therefore, it was not considered as a CPP.                                                                                                                 |
|                                  | Content uniformity | 2 | 1 | 4 | 8   | Low    |                                                                                                                                                                                                                                                                                          |
|                                  | Dissolution        | 2 | 3 | 4 | 24  | Medium |                                                                                                                                                                                                                                                                                          |
|                                  | Hardness           | 1 | 3 | 2 | 6   | Low    |                                                                                                                                                                                                                                                                                          |
|                                  | Friability         | 1 | 3 | 2 | 6   | Low    |                                                                                                                                                                                                                                                                                          |
| Mill screen size                 | Assay              | 4 | 3 | 4 | 48  | High   | The size of the mill screen affects the granule size that is related to flowability and compressibility. Thus, mill screen size might significantly affect assay and content uniformity.                                                                                                 |
|                                  | Content uniformity | 4 | 3 | 4 | 48  | High   |                                                                                                                                                                                                                                                                                          |
|                                  | Dissolution        | 5 | 5 | 4 | 100 | High   | Mill screen size affects the granule size, which is related to the drug release. Smaller granules which have a large surface area are released faster than larger granules because they have a larger water contact area. Thus, mill screen size might significantly affect dissolution. |
|                                  | Hardness           | 3 | 5 | 2 | 30  | Medium | The size of the mill screen affects the granule size that is related to flowability and compressibility, which is related to hardness and friability. Thus, mill screen size might affect hardness and friability.                                                                       |
|                                  | Friability         | 3 | 5 | 2 | 30  | Medium |                                                                                                                                                                                                                                                                                          |
| Environment (temperature and RH) | Assay              | 1 | 3 | 4 | 12  | Low    | The effect of the working environment on the CQAs is low because the manufacturing facility maintains a constant temperature and humidity. Thus, it was not considered as a CPP.                                                                                                         |
|                                  | Content uniformity | 1 | 3 | 4 | 12  | Low    |                                                                                                                                                                                                                                                                                          |
|                                  | Dissolution        | 1 | 3 | 4 | 12  | Low    |                                                                                                                                                                                                                                                                                          |
|                                  | Hardness           | 1 | 3 | 2 | 6   | Low    |                                                                                                                                                                                                                                                                                          |
|                                  | Friability         | 1 | 3 | 2 | 6   | Low    |                                                                                                                                                                                                                                                                                          |

| Risk degree | RPN    | Justification                                                                        |
|-------------|--------|--------------------------------------------------------------------------------------|
| Low         | 1–19   | The risk is widely acceptable, and further investigation is not necessary.           |
| Medium      | 20–39  | The risk is acceptable, but further investigation to reduce the risk is recommended. |
| High        | 40–125 | The risk is unacceptable, and further investigation to reduce the risk is required.  |

Table S3. Experimental design of metformin HCl layer formulation development.

| Run Orders | Control Factors  |             |        |
|------------|------------------|-------------|--------|
|            | Calcium Silicate | HPMC Binder | HPMC   |
|            | $x_1$            | $x_2$       | $x_3$  |
| 1          | 30.00            | 12.50       | 252.50 |
| 2          | 32.74            | 20.00       | 242.26 |
| 3          | 19.58            | 20.00       | 255.42 |
| 4          | 28.88            | 5.00        | 261.12 |
| 5          | 50.00            | 20.00       | 225.00 |
| 6          | 43.43            | 16.09       | 235.48 |
| 7          | 10.00            | 12.01       | 272.99 |
| 8          | 50.00            | 5.00        | 240.00 |
| 9          | 10.00            | 20.00       | 265.00 |
| 10         | 20.04            | 5.00        | 269.96 |

---

|    |       |      |        |
|----|-------|------|--------|
| 11 | 40.48 | 5.00 | 249.52 |
| 12 | 10.00 | 5.00 | 280.00 |

---

**Table S4.** The results of experimental design for the formulation development of metformin HCl layer. C.U., content uniformity; IDR, intrinsic dissolution rate.

| Run<br>Or-<br>ders | Response Factors |      |                |                |                |               |                 |         |                 |                 |                 |                |                |                         |                         |                           |                               |                 |                 |                       |                 |                 |                     |                 |                 |                        |                 |                 |                       |
|--------------------|------------------|------|----------------|----------------|----------------|---------------|-----------------|---------|-----------------|-----------------|-----------------|----------------|----------------|-------------------------|-------------------------|---------------------------|-------------------------------|-----------------|-----------------|-----------------------|-----------------|-----------------|---------------------|-----------------|-----------------|------------------------|-----------------|-----------------|-----------------------|
|                    | CQAs             |      |                |                |                |               |                 | QAs     |                 |                 |                 |                |                |                         |                         |                           |                               |                 |                 |                       |                 |                 |                     |                 |                 |                        |                 |                 |                       |
|                    | As-<br>say       | C.U. | Dissolution    |                |                | Hard-<br>ness | Fria-<br>bility | ID<br>R | Granule Size    |                 |                 |                |                | Tru<br>e<br>den<br>sity | Bul<br>k<br>den<br>sity | Tap<br>ped<br>den<br>sity | Tablet Swell-<br>ing Property |                 |                 | Tablet Weight<br>Gain |                 |                 | Tablet Mass<br>Loss |                 |                 | Tablet Gel<br>Strength |                 |                 | Con-<br>tact<br>Angle |
|                    |                  |      | 1 h            | 3 h            | 10 h           |               |                 |         | D <sub>10</sub> | D <sub>50</sub> | D <sub>90</sub> | D<br>[3,2<br>] | D<br>[4,3<br>] |                         |                         |                           | 1 h                           | 3 h             | 5 h             | 1 h                   | 3 h             | 5 h             | 1 h                 | 3 h             | 5 h             | 1 h                    | 3 h             | 5 h             |                       |
|                    |                  |      | y <sub>1</sub> | y <sub>2</sub> | y <sub>3</sub> |               |                 |         | y <sub>4</sub>  | y <sub>5</sub>  | y <sub>6</sub>  | y <sub>7</sub> | y <sub>8</sub> |                         |                         |                           | y <sub>9</sub>                | y <sub>10</sub> | y <sub>11</sub> | y <sub>12</sub>       | y <sub>13</sub> | y <sub>14</sub> | y <sub>15</sub>     | y <sub>16</sub> | y <sub>17</sub> | y <sub>18</sub>        | y <sub>19</sub> | y <sub>20</sub> |                       |
| 1                  | 102.01           | 2.36 | 39.89          | 72.21          | 103.69         | 17.67         | 0.54            | 7.02    | 21.6            | 136.9           | 652.6           | 61.2           | 379.1          | 0.65                    | 0.055                   | 0.058                     | 34.81                         | 52.48           | 63.51           | 61.51                 | 75.24           | 63.87           | 29.51               | 58.08           | 75.47           | 3.05                   | 5.22            | 3.00            | 7.32                  |
| 2                  | 99.09            | 1.39 | 39.90          | 72.63          | 101.91         | 17.41         | 0.46            | 7.07    | 31.2            | 199.6           | 108.4           | 77.2           | 551.6          | 0.63                    | 0.054                   | 0.057                     | 33.55                         | 52.19           | 62.09           | 61.52                 | 76.46           | 61.25           | 28.31               | 51.77           | 69.08           | 6.90                   | 6.08            | 4.92            | 7.10                  |
| 3                  | 102.01           | 1.90 | 39.63          | 71.48          | 101.42         | 17.79         | 0.50            | 7.15    | 32.4            | 208.5           | 115.8           | 80.8           | 552.8          | 0.66                    | 0.056                   | 0.061                     | 32.15                         | 48.83           | 57.82           | 63.43                 | 78.78           | 66.55           | 27.53               | 50.87           | 68.12           | 8.82                   | 6.92            | 5.85            | 6.44                  |
| 4                  | 99.04            | 1.39 | 40.29          | 72.64          | 102.26         | 17.21         | 0.52            | 6.93    | 17.0            | 29.9            | 330.0           | 33.1           | 121.1          | 0.67                    | 0.054                   | 0.056                     | 29.61                         | 50.81           | 62.29           | 61.14                 | 72.33           | 62.98           | 29.29               | 53.59           | 68.86           | 5.74                   | 4.87            | 3.11            | 7.15                  |
| 5                  | 100.01           | 1.39 | 41.55          | 74.35          | 101.88         | 17.32         | 0.42            | 7.01    | 33.3            | 194.8           | 101.8           | 76.6           | 631.1          | 0.60                    | 0.052                   | 0.053                     | 32.21                         | 54.64           | 66.24           | 54.76                 | 69.11           | 50.74           | 29.27               | 51.05           | 66.74           | 4.49                   | 5.68            | 4.46            | 8.07                  |
| 6                  | 102.04           | 1.93 | 40.44          | 73.40          | 103.31         | 17.85         | 0.41            | 6.94    | 26.8            | 148.6           | 840.1           | 63.9           | 437.8          | 0.61                    | 0.052                   | 0.054                     | 33.94                         | 53.69           | 64.11           | 58.76                 | 71.96           | 57.62           | 29.15               | 55.74           | 71.99           | 3.22                   | 5.37            | 4.23            | 7.66                  |
| 7                  | 104.05           | 0.94 | 37.90          | 70.67          | 101.89         | 17.67         | 0.31            | 7.06    | 27.0            | 140.1           | 837.4           | 62.4           | 410.3          | 0.70                    | 0.056                   | 0.064                     | 31.43                         | 48.4            | 59.88           | 65.46                 | 80.95           | 70.54           | 26.27               | 51.98           | 69.09           | 7.11                   | 6.42            | 4.45            | 6.20                  |
| 8                  | 98.02            | 1.39 | 41.46          | 73.50          | 101.99         | 17.11         | 0.51            | 6.86    | 19.1            | 41.7            | 375.4           | 40.3           | 185.8          | 0.61                    | 0.052                   | 0.051                     | 27.72                         | 52.67           | 62.74           | 59.10                 | 68.49           | 60.29           | 28.76               | 50.22           | 63.74           | 9.00                   | 4.64            | 5.49            | 7.58                  |
| 9                  | 102.04           | 1.93 | 37.85          | 70.61          | 99.45          | 17.03         | 0.61            | 7.13    | 31.5            | 201.1           | 116.6           | 77.0           | 465.2          | 0.67                    | 0.056                   | 0.061                     | 28.86                         | 44.84           | 52.91           | 64.90                 | 83.09           | 67.45           | 25.60               | 46.94           | 63.6            | 13.46                  | 8.37            | 8.11            | 5.30                  |
| 10                 | 100.05           | 1.39 | 38.65          | 71.42          | 101.36         | 17.66         | 0.61            | 6.99    | 20.1            | 49.6            | 495.4           | 43.0           | 212.4          | 0.70                    | 0.055                   | 0.060                     | 29.31                         | 49.16           | 61.84           | 64.99                 | 79.74           | 70.29           | 27.42               | 50.85           | 66.91           | 7.04                   | 5.33            | 3.80            | 6.35                  |
| 11                 | 100.05           | 1.39 | 41.44          | 73.74          | 102.19         | 17.03         | 0.23            | 6.84    | 18.1            | 34.3            | 373.1           | 37.1           | 166.4          | 0.64                    | 0.053                   | 0.055                     | 28.68                         | 51.48           | 62.02           | 58.74                 | 69.50           | 62.36           | 29.47               | 53.05           | 68.95           | 5.98                   | 4.98            | 4.11            | 7.42                  |
| 12                 | 103.06           | 0.95 | 37.86          | 70.20          | 99.44          | 17.77         | 0.27            | 6.97    | 22.1            | 50.2            | 598.1           | 47.3           | 233.2          | 0.72                    | 0.056                   | 0.064                     | 26.69                         | 45.70           | 59.59           | 69.20                 | 82.36           | 75.41           | 26.36               | 47.62           | 63.52           | 8.67                   | 6.25            | 4.40            | 5.60                  |

**Table S5.** Summary of ANOVA for a model of metformin HCl layer formulation development.

| Response                                                 | <i>f</i> -value | <i>p</i> -value | <i>R</i> <sup>2</sup> | Adjusted <i>R</i> <sup>2</sup> | Predicted <i>R</i> <sup>2</sup> |
|----------------------------------------------------------|-----------------|-----------------|-----------------------|--------------------------------|---------------------------------|
| <i>y</i> <sub>3</sub> : Dissolution at 1 h               | 48.58           | < 0.0001        | 0.9152                | 0.8964                         | 0.8561                          |
| <i>y</i> <sub>4</sub> : Dissolution at 3 h               | 89.99           | < 0.0001        | 0.9524                | 0.9418                         | 0.9055                          |
| <i>y</i> <sub>5</sub> : Dissolution at 10 h              | 34.15           | < 0.0001        | 0.9660                | 0.9378                         | 0.8070                          |
| <i>y</i> <sub>8</sub> : Intrinsic dissolution rate       | 51.57           | < 0.0001        | 0.9197                | 0.9019                         | 0.8602                          |
| <i>y</i> <sub>9</sub> : <i>D</i> <sub>10</sub>           | 48.61           | < 0.0001        | 0.9153                | 0.8964                         | 0.8502                          |
| <i>y</i> <sub>10</sub> : <i>D</i> <sub>50</sub>          | 326.37          | < 0.0001        | 0.9864                | 0.9834                         | 0.9777                          |
| <i>y</i> <sub>11</sub> : <i>D</i> <sub>90</sub>          | 154.51          | < 0.0001        | 0.9717                | 0.9654                         | 0.9533                          |
| <i>y</i> <sub>12</sub> : <i>D</i> [3,2]                  | 128.12          | < 0.0001        | 0.9661                | 0.9585                         | 0.9388                          |
| <i>y</i> <sub>13</sub> : <i>D</i> [4,3]                  | 56.48           | < 0.0001        | 0.9262                | 0.9098                         | 0.8468                          |
| <i>y</i> <sub>14</sub> : True density                    | 137.92          | < 0.0001        | 0.9684                | 0.9614                         | 0.9274                          |
| <i>y</i> <sub>15</sub> : Bulk density                    | 73.40           | < 0.0001        | 0.9422                | 0.9294                         | 0.9113                          |
| <i>y</i> <sub>16</sub> : Tapped density                  | 70.77           | < 0.0001        | 0.9402                | 0.9269                         | 0.8776                          |
| <i>y</i> <sub>17</sub> : Tablet swelling property at 1 h | 84.22           | < 0.0001        | 0.9860                | 0.9742                         | 0.9235                          |
| <i>y</i> <sub>18</sub> : Tablet swelling property at 3 h | 42.18           | < 0.0001        | 0.9723                | 0.9493                         | 0.8391                          |
| <i>y</i> <sub>19</sub> : Tablet swelling property at 5 h | 33.32           | < 0.0001        | 0.9652                | 0.9363                         | 0.8023                          |
| <i>y</i> <sub>20</sub> : Tablet weight gain at 1 h       | 44.38           | < 0.0001        | 0.9079                | 0.8875                         | 0.8213                          |
| <i>y</i> <sub>21</sub> : Tablet weight gain at 3 h       | 73.64           | < 0.0001        | 0.9424                | 0.9296                         | 0.9032                          |
| <i>y</i> <sub>22</sub> : Tablet weight gain at 5 h       | 61.81           | < 0.0001        | 0.9321                | 0.9171                         | 0.8712                          |
| <i>y</i> <sub>23</sub> : Tablet mass loss at 1 h         | 24.18           | < 0.0001        | 0.9325                | 0.8939                         | 0.8095                          |
| <i>y</i> <sub>24</sub> : Tablet mass loss at 3 h         | 50.75           | < 0.0001        | 0.9769                | 0.9577                         | 0.8781                          |
| <i>y</i> <sub>25</sub> : Tablet mass loss at 5 h         | 44.31           | < 0.0001        | 0.9736                | 0.9517                         | 0.8510                          |
| <i>y</i> <sub>26</sub> : Tablet gel strength at 1 h      | 42.15           | < 0.0001        | 0.9723                | 0.9493                         | 0.8491                          |
| <i>y</i> <sub>27</sub> : Tablet gel strength at 3 h      | 45.07           | < 0.0001        | 0.9741                | 0.9525                         | 0.8509                          |
| <i>y</i> <sub>28</sub> : Tablet gel strength at 5 h      | 24.52           | < 0.0001        | 0.9534                | 0.9145                         | 0.8445                          |
| <i>y</i> <sub>29</sub> : Tablet contact angle            | 34.65           | < 0.0001        | 0.9665                | 0.9386                         | 0.8073                          |

Coded equations with pooling applied to insignificant factors

$$\begin{aligned}
 y_3 &= 43.03x_1 - 37.67x_2 - 38.12x_3 \\
 y_4 &= 75.39x_1 - 70.91x_2 - 70.53x_3 \\
 y_5 &= 100.17x_1 - 27.91x_2 - 99.74x_3 - 107.03x_1x_2 + 9.52x_1x_3 - 98.60x_2x_3 \\
 y_8 &= -6.78x_1 - 7.58x_2 - 6.99x_3 \\
 y_9 &= -17.35x_1 + 65.88x_2 - 19.90x_3 \\
 y_{10} &= -27.92x_1 + 634.55x_2 - 52.53x_3 \\
 y_{11} &= -250.82x_1 + 2944.40x_2 - 522.93x_3 \\
 y_{12} &= -35.13x_1 + 180.29x_2 - 43.42x_3 \\
 y_{13} &= -198.84x_1 + 1519.90x_2 - 183.84x_3 \\
 y_{14} &= -0.5853x_1 - 0.5953x_2 + 0.7146x_3 \\
 y_{15} &= -0.0502x_1 + 0.0572x_2 + 0.0561x_3 \\
 y_{16} &= -0.0477x_1 + 0.0645x_2 + 0.0627x_3 \\
 y_{17} &= 22.08x_1 + 89.56x_2 - 26.91x_3 + 204.01x_1x_2 + 19.82x_1x_3 + 171.88x_2x_3 \\
 y_{18} &= 51.63x_1 + 22.49x_2 - 46.31x_3 + 115.46x_1x_2 + 10.71x_1x_3 + 90.08x_2x_3 \\
 y_{19} &= 60.64x_1 + 35.98x_2 - 60.17x_3 + 158.94x_1x_2 + 8.48x_1x_3 + 99.50x_2x_3 \\
 y_{20} &= -54.12x_1 + 60.65x_2 + 67.33x_3 \\
 y_{21} &= -62.49x_1 + 87.96x_2 + 81.15x_3 \\
 y_{22} &= -52.63x_1 + 54.20x_2 + 73.95x_3 \\
 y_{23} &= 27.18x_1 - 23.74x_2 - 26.37x_3 + 14.15x_1x_2 + 10.24x_1x_3 \\
 y_{24} &= 43.73x_1 - 149.02x_2 - 47.64x_3 + 299.37x_1x_2 + 29.51x_1x_3 + 266.00x_2x_3 \\
 y_{25} &= 54.59x_1 - 158.48x_2 - 63.44x_3 + 351.35x_1x_2 + 37.59x_1x_3 + 305.57x_2x_3 \\
 y_{26} &= -13.57x_1 + 156.85x_2 + 8.51x_3 - 240.38x_1x_2 - 18.70x_1x_3 - 180.14x_2x_3
 \end{aligned}$$



---

$$y_{27} = -5.57x_1 + 30.65x_2 + 6.15x_3 - 33.74x_1x_2 - 4.46x_1x_3 - 23.75x_2x_3$$

$$y_{28} = -8.73x_1 + 61.65x_2 + 4.23x_3 - 92.53x_1x_2 - 10.32x_1x_3 - 60.72x_2x_3$$

$$y_{29} = -7.61x_1 + 5.31x_2 + 5.74x_3 + 24.72x_1x_2 + 2.51x_1x_3 + 19.26x_2x_3$$

---

**Table S6.** Experimental design of metformin HCl layer process development.

| Run Orders | Control Factors |              |                       |
|------------|-----------------|--------------|-----------------------|
|            | Impeller Speed  | Massing Time | Binder Solvent Amount |
|            | $p^1$           | $p^2$        | $p^3$                 |
| 1          | 50              | 5            | 50                    |
| 2          | 50              | 1            | 50                    |
| 3          | 100             | 5            | 20                    |
| 4          | 100             | 3            | 50                    |
| 5          | 100             | 3            | 50                    |
| 6          | 150             | 3            | 80                    |
| 7          | 50              | 3            | 20                    |
| 8          | 150             | 1            | 50                    |
| 9          | 100             | 5            | 80                    |
| 10         | 150             | 5            | 50                    |
| 11         | 50              | 3            | 80                    |
| 12         | 100             | 1            | 20                    |
| 13         | 150             | 3            | 20                    |
| 14         | 100             | 3            | 50                    |
| 15         | 100             | 1            | 80                    |

**Table S7.** The results of experimental design for the process development of metformin HCl layer. C.U., content uniformity; IDR, intrinsic dissolution rate.

| Run Order      | Response Factors |                |                |                |                |                |                |                |                 |                 |                 |                 |                 |                 |                 |                 |                 |                  |                          |                 |                 |                    |                 |                 |                  |                 |                 |                     |                 |                 |               |
|----------------|------------------|----------------|----------------|----------------|----------------|----------------|----------------|----------------|-----------------|-----------------|-----------------|-----------------|-----------------|-----------------|-----------------|-----------------|-----------------|------------------|--------------------------|-----------------|-----------------|--------------------|-----------------|-----------------|------------------|-----------------|-----------------|---------------------|-----------------|-----------------|---------------|
|                | CQAs             |                |                |                |                |                |                | QAs            |                 |                 |                 |                 |                 |                 |                 |                 |                 |                  |                          |                 |                 |                    |                 |                 |                  |                 |                 |                     |                 |                 |               |
|                | Assay            | C. U.          | Dissolution    |                |                | Hardness       | Friability     | IDR            | Granule Size    |                 |                 |                 |                 | True Density    | Bulk Density    | Carver's Index  | Angle of Repose | Granule Strength | Tablet Swelling Property |                 |                 | Tablet Weight Gain |                 |                 | Tablet Mass Loss |                 |                 | Tablet Gel Strength |                 |                 | Contact Angle |
|                |                  |                | 1 h            | 3 h            | 10 h           |                |                |                | D <sub>10</sub> | D <sub>50</sub> | D <sub>90</sub> | D [3,2]         | D [4,3]         |                 |                 |                 |                 |                  | 1 h                      | 3 h             | 5 h             | 1 h                | 3 h             | 5 h             | 1 h              | 3 h             | 5 h             | 1 h                 | 3 h             | 5 h             |               |
|                |                  |                |                |                |                |                |                |                |                 |                 |                 |                 |                 |                 |                 |                 |                 |                  |                          |                 |                 |                    |                 |                 |                  |                 |                 |                     |                 |                 |               |
| q <sub>1</sub> | q <sub>2</sub>   | q <sub>3</sub> | q <sub>4</sub> | q <sub>5</sub> | q <sub>6</sub> | q <sub>7</sub> | q <sub>8</sub> | q <sub>9</sub> | q <sub>10</sub> | q <sub>11</sub> | q <sub>12</sub> | q <sub>13</sub> | q <sub>14</sub> | q <sub>15</sub> | q <sub>16</sub> | q <sub>17</sub> | q <sub>18</sub> | q <sub>19</sub>  | q <sub>20</sub>          | q <sub>21</sub> | q <sub>22</sub> | q <sub>23</sub>    | q <sub>24</sub> | q <sub>25</sub> | q <sub>26</sub>  | q <sub>27</sub> | q <sub>28</sub> | q <sub>29</sub>     | q <sub>30</sub> | q <sub>31</sub> |               |
| 1              | 104.0            | 1.57           | 45.9           | 78.7           | 105.0          | 17.35          | 0.41           | 6.5            | 25.6            | 51.4            | 750.2           | 47.5            | 355.7           | 0.700           | 0.054           | 22.79           | 39.38           | 0.31             | 31.98                    | 48.64           | 62.66           | 55.4               | 55.13           | 48.34           | 29.86            | 50.09           | 75.46           | 9.27                | 7.54            | 5.20            | 5.16          |
| 2              | 102.1            | 2.2            | 43.0           | 78.7           | 107.7          | 17.44          | 0.29           | 7.0            | 22.3            | 80.0            | 522.1           | 47.6            | 318.0           | 0.695           | 0.059           | 22.03           | 33.10           | 0.14             | 29.82                    | 50.87           | 62.11           | 70.08              | 75.59           | 73.23           | 26.46            | 45.03           | 68.79           | 13.29               | 10.15           | 7.22            | 10.76         |
| 3              | 101.1            | 1.61           | 45.0           | 80.6           | 109.0          | 17.49          | 0.57           | 6.8            | 17.6            | 31.5            | 250.9           | 34.1            | 127.3           | 0.695           | 0.056           | 20.51           | 31.80           | 0.29             | 30.75                    | 50.65           | 62.96           | 58.6               | 59.69           | 44.55           | 33.76            | 50.71           | 77.5            | 5.11                | 3.21            | 3.25            | 3.88          |
| 4              | 101.1            | 1.61           | 44.2           | 78.5           | 106.7          | 17.56          | 0.47           | 7.0            | 25.5            | 52.7            | 528.4           | 47.7            | 364.1           | 0.698           | 0.057           | 22.86           | 35.40           | 0.33             | 30.38                    | 49.32           | 63.27           | 63.85              | 67.24           | 58.17           | 28.92            | 47.20           | 72.25           | 7.38                | 5.73            | 4.58            | 7.18          |
| 5              | 103.1            | 0.18           | 44.1           | 77.9           | 106.4          | 17.51          | 0.32           | 6.9            | 24.7            | 49.2            | 438.4           | 44.7            | 336.4           | 0.698           | 0.057           | 22.79           | 34.50           | 0.29             | 30.47                    | 49.07           | 63.27           | 64.56              | 67.21           | 60.65           | 28.80            | 47.26           | 72.5            | 7.18                | 5.66            | 4.28            | 7.15          |
| 6              | 98.1             | 2.03           | 42.8           | 76.5           | 107.4          | 17.7           | 0.45           | 7.0            | 35.8            | 248.1           | 1267.5          | 96.4            | 636.0           | 0.698           | 0.052           | 26.59           | 42.51           | 0.07             | 30.50                    | 46.49           | 63.67           | 65.43              | 65.04           | 56.55           | 28.85            | 46.20           | 70.42           | 4.63                | 3.64            | 2.63            | 6.10          |
| 7              | 99.1             | 1.61           | 41.9           | 76.6           | 106.7          | 17.41          | 0.41           | 6.7            | 17.0            | 30.2            | 240.1           | 23.7            | 121.7           | 0.696           | 0.057           | 19.75           | 33.50           | 0.05             | 29.82                    | 49.67           | 62.58           | 62.55              | 60.86           | 62.60           | 28.41            | 48.06           | 73.19           | 12.36               | 9.17            | 6.91            | 7.36          |
| 8              | 98.1             | 2.05           | 44.0           | 76.2           | 104.4          | 17.39          | 0.44           | 7.2            | 24.6            | 50.6            | 508.3           | 61.2            | 354.3           | 0.702           | 0.053           | 22.79           | 34.60           | 0.58             | 29.07                    | 49.50           | 63.9            | 66.89              | 70.43           | 63.58           | 25.21            | 45.91           | 70.06           | 4.89                | 4.53            | 4.10            | 4.86          |
| 9              | 102.1            | 2.19           | 44.5           | 76.4           | 105.4          | 17.62          | 0.38           | 6.8            | 36.8            | 283.4           | 1330.3          | 95.6            | 675.0           | 0.700           | 0.053           | 26.59           | 41.40           | 0.21             | 32.34                    | 46.95           | 63.95           | 60.8               | 64.92           | 58.55           | 29.52            | 47.27           | 71.94           | 4.46                | 2.94            | 2.17            | 8.63          |
| 10             | 99.0             | 1.61           | 43.3           | 77.6           | 108.7          | 17.81          | 0.37           | 7.1            | 26.8            | 71.8            | 840.6           | 61.2            | 419.1           | 0.696           | 0.058           | 23.02           | 34.90           | 0.23             | 31.49                    | 48.63           | 63.81           | 63.88              | 69.65           | 54.73           | 33.28            | 48.02           | 73.56           | 1.41                | 1.97            | 1.58            | 7.78          |
| 11             | 98.0             | 2.10           | 47.0           | 80.8           | 105.8          | 17.08          | 0.31           | 6.8            | 34.1            | 253.8           | 1240.6          | 84.9            | 631.0           | 0.698           | 0.053           | 25.45           | 38.20           | 0.36             | 31.72                    | 50.46           | 62.60           | 63.71              | 70.39           | 60.69           | 28.16            | 46.94           | 70.46           | 10.21               | 8.26            | 6.47            | 7.38          |
| 12             | 105.0            | 1.15           | 41.7           | 73.9           | 104.2          | 17.15          | 0.51           | 7.2            | 17.0            | 30.1            | 91.1            | 33.0            | 133.7           | 0.700           | 0.055           | 20.13           | 28.40           | 0.41             | 29.01                    | 50.05           | 64.03           | 67.91              | 75.21           | 75.68           | 24.47            | 45.08           | 69.58           | 9.07                | 6.38            | 5.56            | 9.23          |
| 13             | 98.1             | 2.02           | 45.1           | 77.1           | 106.0          | 17.80          | 0.43           | 7.3            | 18.5            | 29.3            | 245.5           | 36.4            | 126.0           | 0.699           | 0.054           | 20.36           | 27.40           | 0.69             | 29.77                    | 50.58           | 64.42           | 65.35              | 73.87           | 59.95           | 29.72            | 47.92           | 73.51           | 4.1                 | 3.52            | 2.60            | 5.72          |

|    |           |          |          |          |           |           |      |     |          |           |            |          |           |           |           |           |           |          |           |           |           |           |           |           |           |           |           |          |          |          |          |
|----|-----------|----------|----------|----------|-----------|-----------|------|-----|----------|-----------|------------|----------|-----------|-----------|-----------|-----------|-----------|----------|-----------|-----------|-----------|-----------|-----------|-----------|-----------|-----------|-----------|----------|----------|----------|----------|
| 14 | 105<br>.1 | 0.9<br>3 | 44.<br>7 | 78.<br>2 | 106<br>.7 | 17.3<br>0 | 0.33 | 6.8 | 24.<br>7 | 42.<br>0  | 690<br>.7  | 56.<br>0 | 336.<br>4 | 0.6<br>98 | 0.0<br>56 | 22.<br>79 | 35.<br>00 | 0.2<br>8 | 30.<br>45 | 49.<br>42 | 63.<br>27 | 64.<br>22 | 67.<br>21 | 61.<br>3  | 28.<br>07 | 47.<br>26 | 71.<br>88 | 5.6<br>9 | 5.6<br>1 | 4.2<br>8 | 6.1<br>9 |
| 15 | 105<br>.0 | 1.6<br>5 | 45.<br>9 | 81.<br>8 | 108<br>.3 | 17.0<br>7 | 0.44 | 7.0 | 33.<br>8 | 261<br>.5 | 114<br>2.1 | 89.<br>9 | 602.<br>2 | 0.6<br>97 | 0.0<br>53 | 26.<br>59 | 38.<br>10 | 0.2<br>7 | 30.<br>11 | 50.<br>73 | 62.<br>32 | 69.<br>21 | 70.<br>81 | 60.<br>67 | 27.<br>21 | 45.<br>71 | 68.<br>75 | 7.9<br>2 | 6.2<br>8 | 4.7<br>7 | 5.9<br>7 |

**Table S8.** Summary of ANOVA for a model of metformin HCl layer process development.

| Response                                                 | <i>f</i> -value | <i>p</i> -value | <i>R</i> <sup>2</sup> | Adjusted <i>R</i> <sup>2</sup> | Predicted <i>R</i> <sup>2</sup> |
|----------------------------------------------------------|-----------------|-----------------|-----------------------|--------------------------------|---------------------------------|
| <i>q</i> <sub>3</sub> : Dissolution at 1 h               | 69.87           | < 0.0001        | 0.9813                | 0.9672                         | 0.9392                          |
| <i>q</i> <sub>4</sub> : Dissolution at 3 h               | 96.71           | < 0.0001        | 0.9864                | 0.9762                         | 0.9496                          |
| <i>q</i> <sub>5</sub> : Dissolution at 10 h              | 152.48          | < 0.0001        | 0.9913                | 0.9848                         | 0.9620                          |
| <i>q</i> <sub>8</sub> : Intrinsic dissolution rate       | 31.29           | < 0.0001        | 0.9456                | 0.9154                         | 0.9072                          |
| <i>q</i> <sub>9</sub> : <i>D</i> <sub>10</sub>           | 218.20          | < 0.0001        | 0.9835                | 0.9790                         | 0.9674                          |
| <i>q</i> <sub>10</sub> : <i>D</i> <sub>50</sub>          | 356.58          | < 0.0001        | 0.9963                | 0.9935                         | 0.9854                          |
| <i>q</i> <sub>11</sub> : <i>D</i> <sub>90</sub>          | 116.95          | < 0.0001        | 0.9512                | 0.9431                         | 0.9356                          |
| <i>q</i> <sub>12</sub> : <i>D</i> [3,2]                  | 93.94           | < 0.0001        | 0.9400                | 0.9300                         | 0.9173                          |
| <i>q</i> <sub>13</sub> : <i>D</i> [4,3]                  | 385.80          | < 0.0001        | 0.9847                | 0.9821                         | 0.9751                          |
| <i>q</i> <sub>14</sub> : True density                    | 86.66           | < 0.0001        | 0.9848                | 0.9735                         | 0.9193                          |
| <i>q</i> <sub>15</sub> : Bulk density                    | 31.50           | < 0.0001        | 0.9459                | 0.9159                         | 0.8304                          |
| <i>q</i> <sub>16</sub> : Carr's index                    | 228.84          | < 0.0001        | 0.9745                | 0.9702                         | 0.9604                          |
| <i>q</i> <sub>17</sub> : Angle of repose                 | 284.34          | < 0.0001        | 0.9937                | 0.9902                         | 0.9806                          |
| <i>q</i> <sub>18</sub> : Granule strength                | 157.74          | < 0.0001        | 0.9887                | 0.9824                         | 0.9666                          |
| <i>q</i> <sub>19</sub> : Tablet swelling property at 1 h | 181.25          | < 0.0001        | 0.9864                | 0.9810                         | 0.9694                          |
| <i>q</i> <sub>20</sub> : Tablet swelling property at 3 h | 47.30           | < 0.0001        | 0.9726                | 0.9520                         | 0.8738                          |
| <i>q</i> <sub>21</sub> : Tablet swelling property at 5 h | 85.78           | < 0.0001        | 0.9847                | 0.9732                         | 0.9191                          |
| <i>q</i> <sub>22</sub> : Tablet weight gain at 1 h       | 329.39          | < 0.0001        | 0.9925                | 0.9895                         | 0.9839                          |
| <i>q</i> <sub>23</sub> : Tablet weight gain at 3 h       | 748.00          | < 0.0001        | 0.9982                | 0.9969                         | 0.9935                          |
| <i>q</i> <sub>24</sub> : Tablet weight gain at 5 h       | 154.01          | < 0.0001        | 0.9884                | 0.9820                         | 0.9742                          |
| <i>q</i> <sub>25</sub> : Tablet mass loss at 1 h         | 260.51          | < 0.0001        | 0.9931                | 0.9893                         | 0.9899                          |
| <i>q</i> <sub>26</sub> : Tablet mass loss at 3 h         | 1547.02         | < 0.0001        | 0.9991                | 0.9985                         | 0.9957                          |
| <i>q</i> <sub>27</sub> : Tablet mass loss at 5 h         | 222.32          | < 0.0001        | 0.9920                | 0.9875                         | 0.9795                          |
| <i>q</i> <sub>28</sub> : Tablet gel strength at 1 h      | 67.55           | < 0.0001        | 0.9485                | 0.9345                         | 0.9039                          |
| <i>q</i> <sub>29</sub> : Tablet gel strength at 3 h      | 169.89          | < 0.0001        | 0.9922                | 0.9861                         | 0.9690                          |
| <i>q</i> <sub>30</sub> : Tablet gel strength at 5 h      | 76.88           | < 0.0001        | 0.9545                | 0.9421                         | 0.9040                          |
| <i>q</i> <sub>31</sub> : Tablet contact angle            | 57.57           | < 0.0001        | 0.9697                | 0.9528                         | 0.9252                          |

## Coded equations with pooling applied to insignificant factors

$$\begin{aligned}
 q_3 &= -0.3175p_1 - 0.5000p_2 + 0.8100p_3 - 0.8875p_1p_2 - 1.86p_1p_3 - 1.20p_2p_3 + 44.19 \\
 q_4 &= -0.9175p_1 - 0.3137p_2 + 0.9113p_3 + 0.3650p_1p_2 - 1.24p_1p_3 - 3.04p_2p_3 + 77.97 \\
 q_5 &= -0.1537p_1 - 0.4331p_2 + 0.1294p_3 + 1.77p_1p_2 + 0.6100p_1p_3 - 1.94p_2p_3 + 106.56 \\
 q_8 &= 0.2064p_1 - 0.1424p_2 - 0.0641p_3 + 0.1142p_1p_2 - 0.1172p_1p_3 + 6.93 \\
 q_9 &= 0.8437p_1 + 1.12p_2 + 8.81p_3 + 25.65 \\
 q_{10} &= -1.94p_1 + 1.97p_2 + 115.71p_3 + 12.44p_1p_2 + 13.22p_2^2 + 90.09p_3^2 + 49.27 \\
 q_{11} &= 113.56p_2 + 519.11p_3 + 672.44 \\
 q_{12} &= 6.43p_1 + 29.96p_3 + 57.31 \\
 q_{13} &= 21.12p_2 + 254.45p_3 + 369.14 \\
 q_{14} &= 0.0007p_1 - 0.0004p_2 + 0.0004p_3 - 0.0027p_1p_2 - 0.0008p_1p_3 + 0.0020p_2p_3 + 0.6980 \\
 q_{15} &= 0.0008p_1 + 0.00014p_2 - 0.001p_3 + 0.0025p_1p_2 - 0.0022p_3^2 + 0.0563 \\
 q_{16} &= 0.3425p_1 + 3.06p_3 + 23.00 \\
 q_{17} &= -0.5963p_1 + 1.66p_2 + 4.89p_3 - 1.49p_1p_2 + 2.60p_1p_3 + 35.21 \\
 q_{18} &= 0.0887p_1 - 0.0450p_2 - 0.0662p_3 - 0.1300p_1p_2 - 0.2325p_1p_3 + 0.3007 \\
 q_{19} &= -0.3145p_1 + 1.07p_2 + 0.6637p_3 - 0.2921p_1p_3 + 30.51 \\
 q_{20} &= -0.5565p_1 - 0.7864p_2 - 0.7880p_3 + 0.3401p_1p_2 - 1.22p_1p_3 - 1.10p_2p_3 + 49.40 \\
 q_{21} &= 0.7322p_1 + 0.1269p_2 - 0.1833p_3 - 0.1572p_1p_2 - 0.1929p_1p_3 + 0.6752p_2p_3 + 63.26 \\
 q_{22} &= 1.23p_1 - 4.43p_2 + 0.5916p_3 + 2.92p_1p_2 + 64.16 \\
 q_{23} &= 2.13p_1 - 5.33p_2 + 0.1933p_3 + 4.92p_1p_2 - 4.59p_1p_3 + 2.41p_2p_3 + 67.55 \\
 q_{24} &= -1.26p_1 - 8.37p_2 - 0.7901p_3 + 4.01p_1p_2 + 7.25p_2p_3 + 59.95
 \end{aligned}$$

$$\begin{aligned}
 q_{25} &= 0.5242p_1 + 2.88p_2 - 0.3273p_3 + 1.17p_1p_2 - 1.74p_2p_3 + 28.71 \\
 q_{26} &= -0.2603p_1 + 1.80p_2 - 0.7064p_3 - 0.7369p_1p_2 - 0.1490p_1p_3 - 1.02p_2p_3 + 47.24 \\
 q_{27} &= -0.0432p_1 + 2.66p_2 - 1.53p_3 - 0.7928p_1p_2 - 1.18p_2p_3 + 71.99 \\
 q_{28} &= -3.76p_1 - 1.87p_2 - 0.4284p_3 + 7.13 \\
 q_{29} &= -2.68p_1 - 1.46p_2 - 0.1458p_3 + 0.9124p_1^2 - 0.5285p_2^2 - 0.4318p_3^2 + 5.67 \\
 q_{30} &= -1.86p_1 - 1.18p_2 - 0.2840p_3 + 4.37 \\
 q_{31} &= -0.7754p_1 - 0.6699p_2 + 0.2363p_3 + 2.13p_1p_2 + 2.00p_2p_3 + 6.89
 \end{aligned}$$

**Table S9.** Experimental design of dapagliflozin L-proline layer formulation development.

| Run Orders | Control Factors |           |           |
|------------|-----------------|-----------|-----------|
|            | MCC             | Lactose   | L-HPC     |
|            | <i>a1</i>       | <i>a2</i> | <i>a3</i> |
| 1          | 200.16          | 5.56      | 15.65     |
| 2          | 186.59          | 4.78      | 30.00     |
| 3          | 193.40          | 0.00      | 27.97     |
| 4          | 191.37          | 20.00     | 10.00     |
| 5          | 191.48          | 10.43     | 19.46     |
| 6          | 194.74          | 13.56     | 13.07     |
| 7          | 201.37          | 10.00     | 10.00     |
| 8          | 181.37          | 20.00     | 20.00     |
| 9          | 195.50          | 4.39      | 21.48     |
| 10         | 201.37          | 0.00      | 20.00     |
| 11         | 181.37          | 10.75     | 29.25     |
| 12         | 185.08          | 13.49     | 22.79     |
| 13         | 191.37          | 20.00     | 10.00     |

**Table S10.** The results of experimental design for the formulation development of dapagliflozin L-proline layer. C.U., content uniformity; IDR, intrinsic dissolution rate.

| Run<br>Or-<br>ders | Response Factors      |                       |                       |                       |                       |                       |                       |                       |                       |                        |                        |                        |                        |                        |                        |                        |                         |                         |                        |
|--------------------|-----------------------|-----------------------|-----------------------|-----------------------|-----------------------|-----------------------|-----------------------|-----------------------|-----------------------|------------------------|------------------------|------------------------|------------------------|------------------------|------------------------|------------------------|-------------------------|-------------------------|------------------------|
|                    | CQAs                  |                       |                       |                       |                       |                       |                       | QAs                   |                       |                        |                        |                        |                        |                        |                        |                        |                         |                         |                        |
|                    | Assay                 | C.U.                  | Dissolution           |                       |                       | Hardness              | Friability            | IDR                   | Granule size          |                        |                        |                        |                        | Ribbon<br>Density      | Bulk<br>Density        | Tapped<br>Density      | Angle<br>of Re-<br>pose | Granule<br>Strengt<br>h | Con-<br>tact<br>Angle  |
|                    |                       |                       | 5 min                 | 10 min                | 15 min                |                       |                       |                       | D <sub>10</sub>       | D <sub>50</sub>        | D <sub>90</sub>        | D [3,2]                | D [4,3]                |                        |                        |                        |                         |                         |                        |
|                    | <i>b</i> <sub>1</sub> | <i>b</i> <sub>2</sub> | <i>b</i> <sub>3</sub> | <i>b</i> <sub>4</sub> | <i>b</i> <sub>5</sub> | <i>b</i> <sub>6</sub> | <i>b</i> <sub>7</sub> | <i>b</i> <sub>8</sub> | <i>b</i> <sub>9</sub> | <i>b</i> <sub>10</sub> | <i>b</i> <sub>11</sub> | <i>b</i> <sub>12</sub> | <i>b</i> <sub>13</sub> | <i>b</i> <sub>14</sub> | <i>b</i> <sub>15</sub> | <i>b</i> <sub>16</sub> | <i>b</i> <sub>17</sub>  | <i>b</i> <sub>18</sub>  | <i>b</i> <sub>19</sub> |
| 1                  | 99.02                 | 1.24                  | 41.26                 | 57.13                 | 78.66                 | 27.80                 | 0.26                  | 0.019                 | 10.27                 | 69.93                  | 377.00                 | 16.23                  | 140.67                 | 0.864                  | 0.054                  | 0.700                  | 40.86                   | 0.20                    | 6.59                   |
| 2                  | 100.04                | 2.76                  | 48.14                 | 74.42                 | 81.42                 | 27.54                 | 0.41                  | 0.016                 | 9.07                  | 60.20                  | 275.67                 | 15.13                  | 110.33                 | 0.858                  | 0.059                  | 0.695                  | 37.77                   | 0.18                    | 7.02                   |
| 3                  | 104.10                | 0.36                  | 43.83                 | 66.84                 | 81.91                 | 27.03                 | 0.36                  | 0.014                 | 8.18                  | 61.90                  | 255.58                 | 14.27                  | 115.33                 | 0.858                  | 0.056                  | 0.6948                 | 37.50                   | 0.17                    | 7.21                   |
| 4                  | 105.06                | 0.32                  | 64.97                 | 82.14                 | 90.80                 | 27.77                 | 0.36                  | 0.015                 | 8.25                  | 60.03                  | 204.00                 | 14.53                  | 107.91                 | 0.857                  | 0.057                  | 0.698                  | 42.30                   | 0.06                    | 7.08                   |
| 5                  | 100.02                | 1.76                  | 41.20                 | 62.17                 | 81.52                 | 27.01                 | 0.14                  | 0.017                 | 9.99                  | 62.77                  | 256.67                 | 15.80                  | 101.60                 | 0.861                  | 0.057                  | 0.698                  | 42.30                   | 0.20                    | 7.14                   |
| 6                  | 102.06                | 0.32                  | 46.00                 | 67.93                 | 87.10                 | 27.34                 | 0.29                  | 0.016                 | 9.91                  | 65.70                  | 260.33                 | 15.90                  | 114.41                 | 0.860                  | 0.052                  | 0.698                  | 42.30                   | 0.11                    | 6.73                   |
| 7                  | 102.07                | 1.33                  | 45.83                 | 65.86                 | 80.11                 | 27.31                 | 0.16                  | 0.019                 | 11.08                 | 72.85                  | 363.97                 | 16.50                  | 145.87                 | 0.866                  | 0.057                  | 0.696                  | 39.58                   | 0.14                    | 6.07                   |
| 8                  | 104.08                | 1.34                  | 62.21                 | 72.92                 | 87.56                 | 27.06                 | 0.14                  | 0.019                 | 8.26                  | 60.62                  | 292.77                 | 14.87                  | 116.90                 | 0.861                  | 0.053                  | 0.702                  | 39.40                   | 0.34                    | 7.41                   |
| 9                  | 104.10                | 0.36                  | 37.47                 | 53.56                 | 79.70                 | 27.01                 | 0.24                  | 0.015                 | 9.90                  | 65.35                  | 324.00                 | 15.65                  | 123.00                 | 0.860                  | 0.053                  | 0.700                  | 42.08                   | 0.22                    | 6.93                   |
| 10                 | 98.01                 | 2.25                  | 37.19                 | 56.54                 | 77.92                 | 27.59                 | 0.28                  | 0.016                 | 8.92                  | 69.57                  | 361.46                 | 15.23                  | 142.29                 | 0.863                  | 0.058                  | 0.696                  | 39.00                   | 0.26                    | 6.87                   |
| 11                 | 104.09                | 1.35                  | 53.99                 | 80.22                 | 81.32                 | 27.09                 | 0.24                  | 0.019                 | 9.33                  | 63.13                  | 293.91                 | 15.20                  | 115.88                 | 0.863                  | 0.053                  | 0.698                  | 35.60                   | 0.28                    | 6.80                   |
| 12                 | 105.05                | 3.31                  | 53.22                 | 66.75                 | 85.79                 | 27.90                 | 0.12                  | 0.017                 | 9.54                  | 60.43                  | 286.67                 | 15.65                  | 110.47                 | 0.860                  | 0.055                  | 0.700                  | 41.61                   | 0.25                    | 7.22                   |

---

|    |        |      |       |       |       |       |      |       |      |       |        |       |        |       |       |       |       |      |      |
|----|--------|------|-------|-------|-------|-------|------|-------|------|-------|--------|-------|--------|-------|-------|-------|-------|------|------|
| 13 | 101.04 | 2.76 | 65.31 | 80.42 | 93.68 | 27.76 | 0.33 | 0.014 | 8.97 | 60.10 | 226.15 | 15.07 | 116.00 | 0.856 | 0.054 | 0.699 | 41.76 | 0.11 | 7.21 |
|----|--------|------|-------|-------|-------|-------|------|-------|------|-------|--------|-------|--------|-------|-------|-------|-------|------|------|



**Table S11.** Summary of ANOVA for a model of dapagliflozin L-proline layer formulation development.

| Response                                                                                  | <i>f</i> -value | <i>p</i> -value | <i>R</i> <sup>2</sup> | Adjusted <i>R</i> <sup>2</sup> | Predicted <i>R</i> <sup>2</sup> |
|-------------------------------------------------------------------------------------------|-----------------|-----------------|-----------------------|--------------------------------|---------------------------------|
| <i>b</i> <sub>3</sub> : Dissolution at 5 min                                              | 54.56           | < 0.0001        | 0.9750                | 0.9571                         | 0.9248                          |
| <i>b</i> <sub>4</sub> : Dissolution at 10 min                                             | 38.30           | < 0.0001        | 0.9504                | 0.9256                         | 0.8606                          |
| <i>b</i> <sub>5</sub> : Dissolution at 15 min                                             | 25.81           | < 0.0001        | 0.9486                | 0.9118                         | 0.8480                          |
| <i>b</i> <sub>8</sub> : Intrinsic dissolution rate                                        | 27.49           | < 0.0001        | 0.9515                | 0.9169                         | 0.8509                          |
| <i>b</i> <sub>9</sub> : D <sub>10</sub>                                                   | 35.92           | < 0.0001        | 0.9473                | 0.9209                         | 0.8456                          |
| <i>b</i> <sub>10</sub> : D <sub>50</sub>                                                  | 87.64           | < 0.0001        | 0.9843                | 0.9730                         | 0.9443                          |
| <i>b</i> <sub>11</sub> : D <sub>90</sub>                                                  | 19.19           | < 0.0001        | 0.9620                | 0.9434                         | 0.9091                          |
| <i>b</i> <sub>12</sub> : D [3,2]                                                          | 36.34           | < 0.0001        | 0.9477                | 0.92151                        | 0.8319                          |
| <i>b</i> <sub>13</sub> : D [4,3]                                                          | 28.35           | < 0.0001        | 0.9341                | 0.9012                         | 0.8707                          |
| <i>b</i> <sub>14</sub> : Ribbon density                                                   | 31.56           | < 0.0001        | 0.9575                | 0.9272                         | 0.8331                          |
| <i>b</i> <sub>15</sub> : Bulk density                                                     | 58.96           | < 0.0001        | 0.9768                | 0.9602                         | 0.9313                          |
| <i>b</i> <sub>16</sub> : Tapped density                                                   | 31.44           | < 0.0001        | 0.9129                | 0.8839                         | 0.8308                          |
| <i>b</i> <sub>17</sub> : Angle of repose                                                  | 29.54           | < 0.0001        | 0.9548                | 0.9224                         | 0.8459                          |
| <i>b</i> <sub>18</sub> : Granule strength                                                 | 44.51           | < 0.0001        | 0.9695                | 0.9477                         | 0.9082                          |
| <i>b</i> <sub>19</sub> : Tablet contact angle                                             | 93.46           | < 0.0001        | 0.9689                | 0.9585                         | 0.9460                          |
| Coded equations with pooling applied to insignificant factors                             |                 |                 |                       |                                |                                 |
| $b_3 = 45.25a_1 + 99.30a_2 + 72.35a_3 - 75.81a_1a_2 - 74.39a_1a_3 - 120.20a_2a_3$         |                 |                 |                       |                                |                                 |
| $b_4 = 54.20a_1 + 93.99a_2 + 115.50a_3 - 100.99a_1a_2 - 129.78a_2a_3$                     |                 |                 |                       |                                |                                 |
| $b_5 = 68.36a_1 + 103.81a_2 + 82.72a_3 + 1.87a_1a_2 + 19.18a_1a_3 - 38.80a_2a_3$          |                 |                 |                       |                                |                                 |
| $b_8 = 0.0257a_1 + 0.0133a_2 + 0.0147a_3 - 0.0121a_1a_2 - 0.0236a_1a_3 + 0.0219a_2a_3$    |                 |                 |                       |                                |                                 |
| $b_9 = 10.06a_1 + 3.46a_2 + 6.95a_3 + 13.29a_1a_2 + 15.96a_2a_3$                          |                 |                 |                       |                                |                                 |
| $b_{10} = 82.52a_1 + 52.44a_2 + 60.10a_3 - 20.09a_1a_2 - 43.95a_1a_3 + 23.30a_2a_3$       |                 |                 |                       |                                |                                 |
| $b_{11} = 620.20a_1 + 174.23a_2 + 231.55a_3 - 492.78a_1a_2 - 516.52a_1a_3 + 420.20a_2a_3$ |                 |                 |                       |                                |                                 |
| $b_{12} = 16.39a_1 + 11.46a_2 + 13.01a_3 + 7.69a_1a_2 + 12.70a_2a_3$                      |                 |                 |                       |                                |                                 |
| $b_{13} = 221.88a_1 + 115.68a_2 + 118.05a_3 - 184.90a_1a_2 - 191.51a_1a_3$                |                 |                 |                       |                                |                                 |
| $b_{14} = 0.8787a_1 + 0.8520a_2 + 0.8576a_3 - 0.0193a_1a_2 - 0.0372a_1a_3 + 0.0309a_2a_3$ |                 |                 |                       |                                |                                 |
| $b_{15} = 0.0603a_1 + 0.0468a_2 + 0.0464a_3 - 0.0172a_1a_2 - 0.0207a_1a_3 + 0.0100a_2a_3$ |                 |                 |                       |                                |                                 |
| $b_{16} = 0.0660a_1 + 0.0660a_2 + 0.0658a_3 - 0.0104a_2a_3$                               |                 |                 |                       |                                |                                 |
| $b_{17} = 30.17a_1 + 36.90a_2 + 24.51a_3 + 32.43a_1a_2 + 47.50a_1a_3 + 30.66a_2a_3$       |                 |                 |                       |                                |                                 |
| $b_{18} = 0.3910a_1 + 0.2484a_2 + 0.0474a_3 - 0.9566a_1a_2 - 0.0512a_1a_3 + 0.6977a_2a_3$ |                 |                 |                       |                                |                                 |
| $b_{19} = 5.05a_1 + 8.12a_2 + 6.08a_3 + 6.38a_1a_3$                                       |                 |                 |                       |                                |                                 |

**Table S12.** Experimental design of dapagliflozin L-proline layer process development.

| Run Orders | Control Factors |            |                  |
|------------|-----------------|------------|------------------|
|            | Roller Pressure | Roller Gap | Mill Screen Size |
|            | <i>c1</i>       | <i>c2</i>  | <i>c3</i>        |
| 1          | 7               | 1.2        | 0.5              |
| 2          | 3               | 1.8        | 0.5              |
| 3          | 7               | 1.8        | 1.0              |
| 4          | 7               | 1.8        | 1.0              |
| 5          | 11              | 2.4        | 1.0              |
| 6          | 3               | 1.8        | 1.5              |
| 7          | 11              | 1.8        | 1.5              |
| 8          | 3               | 2.4        | 1.0              |
| 9          | 7               | 1.8        | 1.0              |
| 10         | 7               | 1.2        | 1.5              |
| 11         | 7               | 2.4        | 0.5              |
| 12         | 11              | 1.2        | 1.0              |
| 13         | 11              | 1.8        | 0.5              |
| 14         | 3               | 1.2        | 1.0              |
| 15         | 7               | 2.4        | 1.5              |

**Table S13.** The results of experimental design for the process development of dapagliflozin L-proline layer. C.U., content uniformity; IDR, intrinsic dissolution rate

| Run<br>Or-<br>ders | Response Factors      |                       |                       |                       |                       |                       |                       |                       |                       |                        |                        |                        |                        |                        |                        |                        |                        |                        |                        |
|--------------------|-----------------------|-----------------------|-----------------------|-----------------------|-----------------------|-----------------------|-----------------------|-----------------------|-----------------------|------------------------|------------------------|------------------------|------------------------|------------------------|------------------------|------------------------|------------------------|------------------------|------------------------|
|                    | CQAs                  |                       |                       |                       |                       |                       |                       |                       | QAs                   |                        |                        |                        |                        |                        |                        |                        |                        |                        |                        |
|                    | Assay                 | C.U.                  | Dissolution           |                       |                       | Hardness              | Friability            | IDR                   | Granule Size          |                        |                        |                        |                        | Ribbon<br>Den-<br>sity | Bulk<br>Den-<br>sity   | Tapped<br>Den-<br>sity | Granule<br>Strength    | Granule<br>Uniformity  | Contact<br>Angle       |
|                    |                       |                       | 5 min                 | 10 min                | 15 min                |                       |                       |                       | D <sub>10</sub>       | D <sub>50</sub>        | D <sub>90</sub>        | D [3,2]                | D [4,3]                |                        |                        |                        |                        |                        |                        |
|                    | <i>d</i> <sub>1</sub> | <i>d</i> <sub>2</sub> | <i>d</i> <sub>3</sub> | <i>d</i> <sub>4</sub> | <i>d</i> <sub>5</sub> | <i>d</i> <sub>6</sub> | <i>d</i> <sub>7</sub> | <i>d</i> <sub>8</sub> | <i>d</i> <sub>9</sub> | <i>d</i> <sub>10</sub> | <i>d</i> <sub>11</sub> | <i>d</i> <sub>12</sub> | <i>d</i> <sub>13</sub> | <i>d</i> <sub>14</sub> | <i>d</i> <sub>15</sub> | <i>d</i> <sub>16</sub> | <i>d</i> <sub>17</sub> | <i>d</i> <sub>18</sub> | <i>d</i> <sub>19</sub> |
| 1                  | 100.08                | 1.17                  | 64.88                 | 83.15                 | 92.65                 | 27.33                 | 0.30                  | 0.019                 | 8.50                  | 63.77                  | 277.48                 | 15.10                  | 113.77                 | 0.89                   | 0.054                  | 0.066                  | 0.11                   | 3.48                   | 7.45                   |
| 2                  | 101.10                | 2.10                  | 65.78                 | 86.80                 | 93.87                 | 27.19                 | 0.16                  | 0.019                 | 8.69                  | 59.80                  | 245.78                 | 14.71                  | 106.10                 | 0.76                   | 0.055                  | 0.066                  | 0.04                   | 2.00                   | 7.72                   |
| 3                  | 101.06                | 3.10                  | 53.22                 | 72.92                 | 85.79                 | 27.41                 | 0.14                  | 0.016                 | 9.20                  | 63.55                  | 277.32                 | 15.21                  | 117.32                 | 0.86                   | 0.049                  | 0.065                  | 0.17                   | 2.63                   | 7.14                   |
| 4                  | 100.03                | 3.12                  | 48.14                 | 67.93                 | 81.91                 | 27.26                 | 0.20                  | 0.016                 | 9.20                  | 63.43                  | 278.15                 | 15.23                  | 117.32                 | 0.87                   | 0.050                  | 0.065                  | 0.18                   | 2.50                   | 7.08                   |
| 5                  | 102.02                | 2.90                  | 45.83                 | 66.75                 | 81.42                 | 27.02                 | 0.28                  | 0.015                 | 9.50                  | 64.05                  | 299.70                 | 15.63                  | 122.00                 | 0.96                   | 0.048                  | 0.065                  | 0.34                   | 2.80                   | 6.83                   |
| 6                  | 98.02                 | 1.20                  | 41.26                 | 62.17                 | 80.11                 | 27.08                 | 0.34                  | 0.014                 | 9.03                  | 62.30                  | 275.53                 | 15.07                  | 115.23                 | 0.79                   | 0.049                  | 0.065                  | 0.06                   | 3.04                   | 6.80                   |
| 7                  | 98.07                 | 2.08                  | 37.19                 | 53.56                 | 75.96                 | 27.86                 | 0.25                  | 0.013                 | 9.78                  | 66.85                  | 317.14                 | 15.70                  | 128.54                 | 1.01                   | 0.045                  | 0.065                  | 0.29                   | 3.10                   | 6.43                   |
| 8                  | 99.05                 | 1.97                  | 56.21                 | 74.38                 | 87.56                 | 27.13                 | 0.27                  | 0.017                 | 8.98                  | 60.68                  | 260.21                 | 15.00                  | 110.93                 | 0.76                   | 0.050                  | 0.065                  | 0.11                   | 2.10                   | 7.21                   |
| 9                  | 103.01                | 0.20                  | 46.00                 | 66.84                 | 81.52                 | 27.99                 | 0.14                  | 0.016                 | 9.34                  | 62.87                  | 286.82                 | 15.21                  | 115.98                 | 0.88                   | 0.049                  | 0.065                  | 0.20                   | 2.63                   | 7.02                   |
| 10                 | 98.02                 | 2.61                  | 37.93                 | 57.13                 | 79.70                 | 27.97                 | 0.28                  | 0.014                 | 10.10                 | 65.90                  | 292.74                 | 15.28                  | 123.86                 | 0.90                   | 0.047                  | 0.066                  | 0.14                   | 1.70                   | 6.73                   |
| 11                 | 99.06                 | 1.60                  | 65.31                 | 82.14                 | 93.68                 | 27.50                 | 0.22                  | 0.018                 | 9.98                  | 61.74                  | 267.34                 | 15.13                  | 110.78                 | 0.85                   | 0.052                  | 0.065                  | 0.20                   | 1.22                   | 7.41                   |
| 12                 | 99.05                 | 2.39                  | 47.73                 | 65.86                 | 81.32                 | 27.67                 | 0.21                  | 0.015                 | 9.82                  | 66.90                  | 307.80                 | 15.53                  | 124.74                 | 1.00                   | 0.047                  | 0.066                  | 0.25                   | 2.50                   | 6.87                   |
| 13                 | 98.04                 | 2.80                  | 60.82                 | 80.42                 | 90.80                 | 27.14                 | 0.12                  | 0.018                 | 9.69                  | 63.03                  | 294.92                 | 15.42                  | 116.70                 | 0.99                   | 0.051                  | 0.066                  | 0.28                   | 2.40                   | 7.22                   |
| 14                 | 100.03                | 1.38                  | 53.99                 | 74.42                 | 87.10                 | 28.31                 | 0.22                  | 0.018                 | 8.74                  | 62.37                  | 263.26                 | 14.79                  | 112.64                 | 0.80                   | 0.052                  | 0.066                  | 0.03                   | 2.40                   | 7.21                   |

---

|    |        |      |       |       |       |       |      |       |      |       |        |       |        |      |       |       |      |      |      |
|----|--------|------|-------|-------|-------|-------|------|-------|------|-------|--------|-------|--------|------|-------|-------|------|------|------|
| 15 | 100.01 | 2.93 | 37.47 | 56.54 | 78.66 | 29.72 | 0.28 | 0.013 | 8.62 | 62.66 | 286.67 | 15.38 | 121.12 | 0.87 | 0.048 | 0.065 | 0.22 | 3.90 | 6.59 |
|----|--------|------|-------|-------|-------|-------|------|-------|------|-------|--------|-------|--------|------|-------|-------|------|------|------|

**Table S14.** Summary of ANOVA for a model of dapagliflozin L-proline layer process development.

| Response                                                                       | <i>f</i> -value | <i>p</i> -value | <i>R</i> <sup>2</sup> | Adjusted <i>R</i> <sup>2</sup> | Predicted <i>R</i> <sup>2</sup> |
|--------------------------------------------------------------------------------|-----------------|-----------------|-----------------------|--------------------------------|---------------------------------|
| <i>d</i> <sub>2</sub> : Content uniformity                                     | 141.20          | < 0.0001        | 0.9747                | 0.9678                         | 0.9482                          |
| <i>d</i> <sub>3</sub> : Dissolution at 5 min                                   | 151.43          | < 0.0001        | 0.9619                | 0.9555                         | 0.9479                          |
| <i>d</i> <sub>4</sub> : Dissolution at 10 min                                  | 308.85          | < 0.0001        | 0.9809                | 0.9778                         | 0.9755                          |
| <i>d</i> <sub>5</sub> : Dissolution at 15 min                                  | 80.30           | < 0.0001        | 0.9305                | 0.9189                         | 0.9067                          |
| <i>d</i> <sub>8</sub> : Intrinsic dissolution rate                             | 216.80          | < 0.0001        | 0.9834                | 0.9788                         | 0.9699                          |
| <i>d</i> <sub>9</sub> : <i>D</i> <sub>10</sub>                                 | 150.77          | < 0.0001        | 0.9882                | 0.9816                         | 0.9725                          |
| <i>d</i> <sub>10</sub> : <i>D</i> <sub>50</sub>                                | 56.01           | < 0.0001        | 0.9386                | 0.9218                         | 0.8731                          |
| <i>d</i> <sub>11</sub> : <i>D</i> <sub>90</sub>                                | 123.32          | < 0.0001        | 0.9711                | 0.9633                         | 0.9502                          |
| <i>d</i> <sub>12</sub> : <i>D</i> [3,2]                                        | 239.78          | < 0.0001        | 0.9849                | 0.9808                         | 0.9682                          |
| <i>d</i> <sub>13</sub> : <i>D</i> [4,3]                                        | 317.78          | < 0.0001        | 0.9886                | 0.9855                         | 0.9783                          |
| <i>d</i> <sub>14</sub> : Ribbon density                                        | 282.23          | < 0.0001        | 0.9792                | 0.9757                         | 0.9689                          |
| <i>d</i> <sub>15</sub> : Bulk density                                          | 46.83           | < 0.0001        | 0.9274                | 0.9076                         | 0.8580                          |
| <i>d</i> <sub>16</sub> : Tapped density                                        | 148.16          | < 0.0001        | 0.9758                | 0.9693                         | 0.9507                          |
| <i>d</i> <sub>17</sub> : Granule strength                                      | 266.39          | < 0.0001        | 0.9864                | 0.9827                         | 0.9765                          |
| <i>d</i> <sub>18</sub> : Granule uniformity                                    | 49.26           | < 0.0001        | 0.9517                | 0.9324                         | 0.8762                          |
| <i>d</i> <sub>19</sub> : Tablet contact angle                                  | 290.74          | < 0.0001        | 0.9798                | 0.9764                         | 0.9687                          |
| Coded equations with pooling applied to insignificant factors                  |                 |                 |                       |                                |                                 |
| $d_2 = 0.1575c_1 - 0.0071c_2 + 0.3304c_3 + 1.11c_2c_3 + 3.10$                  |                 |                 |                       |                                |                                 |
| $d_3 = -3.21c_1 - 12.87c_3 + 50.78$                                            |                 |                 |                       |                                |                                 |
| $d_4 = -3.90c_1 - 12.89c_3 + 70.07$                                            |                 |                 |                       |                                |                                 |
| $d_5 = -2.39c_1 - 7.07c_3 + 84.80$                                             |                 |                 |                       |                                |                                 |
| $d_8 = -0.0008c_1 - 0.0003c_2 - 0.0023c_3 + 0.0161$                            |                 |                 |                       |                                |                                 |
| $d_9 = 0.4187c_1 - 0.0100c_2 + 0.0837c_3 - 0.1400c_1c_2 - 0.7400c_2c_3 + 9.28$ |                 |                 |                       |                                |                                 |
| $d_{10} = 1.96c_1 - 1.23c_2 + 1.17c_3 + 63.33$                                 |                 |                 |                       |                                |                                 |
| $d_{11} = 26.85c_1 - 3.42c_2 + 10.82c_3 + 282.06$                              |                 |                 |                       |                                |                                 |
| $d_{12} = 0.3387c_1 + 0.0545c_2 + 0.1342c_3 + 15.23$                           |                 |                 |                       |                                |                                 |
| $d_{13} = 5.89c_1 - 1.27c_2 + 5.17c_3 + 117.14$                                |                 |                 |                       |                                |                                 |
| $d_{14} = 0.1062c_1 - 0.0187c_2 + 0.8794$                                      |                 |                 |                       |                                |                                 |
| $d_{15} = -0.0019c_1 - 0.0002c_2 + 0.0028c_3 + 0.0498$                         |                 |                 |                       |                                |                                 |
| $d_{16} = 0.0001c_1 - 0.0004c_2 - 0.0003c_3 + 0.0655$                          |                 |                 |                       |                                |                                 |
| $d_{17} = 0.1144c_1 + 0.0420c_2 + 0.0099c_3 + 0.1749$                          |                 |                 |                       |                                |                                 |
| $d_{18} = -0.5594c_1 + 0.2319c_2 - 0.3562c_3 + 0.1575$                         |                 |                 |                       |                                |                                 |
| $d_{19} = -0.1988c_1 - 0.4063c_3 + 7.05$                                       |                 |                 |                       |                                |                                 |

**Table S15.** The results of stability test of optimized metformin HCl layer. The results of appearance, identification, and related substances are not indicated, but they satisfied the criteria.

| Assay                                  |          |          |          |                                      |          |          |          |          |           |
|----------------------------------------|----------|----------|----------|--------------------------------------|----------|----------|----------|----------|-----------|
| Accelerated (40 °C ± 2 °C/75% ± 5% RH) |          |          |          | Long-term (25 °C ± 2 °C/60% ± 5% RH) |          |          |          |          |           |
| Initial                                | 1 months | 3 months | 6 months | Initial                              | 1 months | 3 months | 6 months | 9 months | 12 months |
| 100.18                                 | 99.76    | 100.14   | 99.79    | 100.18                               | 99.67    | 100.56   | 99.65    | 100.28   | 99.74     |
| Uniformity of dosage units             |          |          |          |                                      |          |          |          |          |           |
| Accelerated (40 °C ± 2 °C/75% ± 5% RH) |          |          |          | Long-term (25 °C ± 2 °C/60% ± 5% RH) |          |          |          |          |           |
| Initial                                | 1 months | 3 months | 6 months | Initial                              | 1 months | 3 months | 6 months | 9 months | 12 months |
| 1.37                                   | 1.04     | 1.63     | 0.85     | 1.37                                 | 0.61     | 1.47     | 0.84     | 1.41     | 2.36      |
| Dissolution at 1 h                     |          |          |          |                                      |          |          |          |          |           |
| Accelerated (40 °C ± 2 °C/75% ± 5% RH) |          |          |          | Long-term (25 °C ± 2 °C/60% ± 5% RH) |          |          |          |          |           |
| Initial                                | 1 months | 3 months | 6 months | Initial                              | 1 months | 3 months | 6 months | 9 months | 12 months |
| 26.27                                  | 26.77    | 26.87    | 25.90    | 26.27                                | 26.63    | 26.53    | 26.10    | 27.00    | 26.73     |

| Dissolution at 3 h                     |          |          |          |                                      |          |          |          |          |           |
|----------------------------------------|----------|----------|----------|--------------------------------------|----------|----------|----------|----------|-----------|
| Accelerated (40 °C ± 2 °C/75% ± 5% RH) |          |          |          | Long-term (25 °C ± 2 °C/60% ± 5% RH) |          |          |          |          |           |
| Initial                                | 1 months | 3 months | 6 months | Initial                              | 1 months | 3 months | 6 months | 9 months | 12 months |
| 52.07                                  | 52.37    | 51.73    | 51.70    | 52.07                                | 52.27    | 51.90    | 51.83    | 52.80    | 52.43     |

  

| Dissolution at 10 h                    |          |          |          |                                      |          |          |          |          |           |
|----------------------------------------|----------|----------|----------|--------------------------------------|----------|----------|----------|----------|-----------|
| Accelerated (40 °C ± 2 °C/75% ± 5% RH) |          |          |          | Long-term (25 °C ± 2 °C/60% ± 5% RH) |          |          |          |          |           |
| Initial                                | 1 months | 3 months | 6 months | Initial                              | 1 months | 3 months | 6 months | 9 months | 12 months |
| 90.53                                  | 91.53    | 90.43    | 91.50    | 90.53                                | 90.17    | 91.30    | 91.60    | 92.20    | 90.57     |

**Table S16.** The results of stability test of optimized dapagliflozin L-proline layer. The results of appearance, identification, and related substances are not indicated, but they satisfied the criteria.

| Assay                                  |          |          |          |                                      |          |          |          |          |           |
|----------------------------------------|----------|----------|----------|--------------------------------------|----------|----------|----------|----------|-----------|
| Accelerated (40 °C ± 2 °C/75% ± 5% RH) |          |          |          | Long-term (25 °C ± 2 °C/60% ± 5% RH) |          |          |          |          |           |
| Initial                                | 1 months | 3 months | 6 months | Initial                              | 1 months | 3 months | 6 months | 9 months | 12 months |
| 100.77                                 | 100.85   | 99.27    | 99.90    | 100.77                               | 101.19   | 100.57   | 99.84    | 100.41   | 100.03    |

  

| Uniformity of dosage units             |          |          |          |                                      |          |          |          |          |           |
|----------------------------------------|----------|----------|----------|--------------------------------------|----------|----------|----------|----------|-----------|
| Accelerated (40 °C ± 2 °C/75% ± 5% RH) |          |          |          | Long-term (25 °C ± 2 °C/60% ± 5% RH) |          |          |          |          |           |
| Initial                                | 1 months | 3 months | 6 months | Initial                              | 1 months | 3 months | 6 months | 9 months | 12 months |
| 5.59                                   | 8.54     | 8.38     | 9.05     | 5.59                                 | 6.43     | 9.03     | 7.44     | 6.83     | 6.76      |

  

| Dissolution at 1 h                     |          |          |          |                                      |          |          |          |          |           |
|----------------------------------------|----------|----------|----------|--------------------------------------|----------|----------|----------|----------|-----------|
| Accelerated (40 °C ± 2 °C/75% ± 5% RH) |          |          |          | Long-term (25 °C ± 2 °C/60% ± 5% RH) |          |          |          |          |           |
| Initial                                | 1 months | 3 months | 6 months | Initial                              | 1 months | 3 months | 6 months | 9 months | 12 months |
| 90.47                                  | 89.53    | 89.47    | 91.43    | 90.47                                | 88.77    | 92.23    | 89.20    | 89.30    | 92.47     |

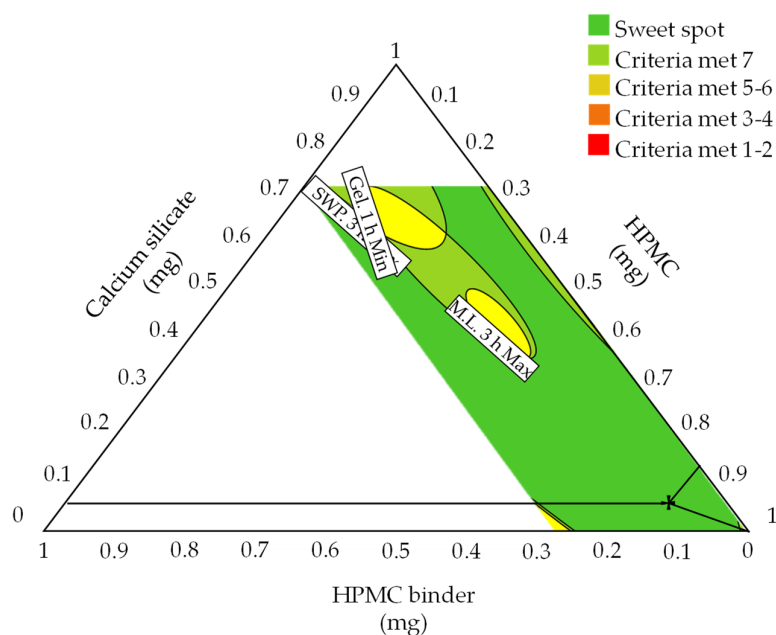

**Figure S1.** Sweet spot plot of formulation development for metformin HCl layer. Gel., tablet gel strength; SWP., tablet swelling property; M.L., tablet mass loss.

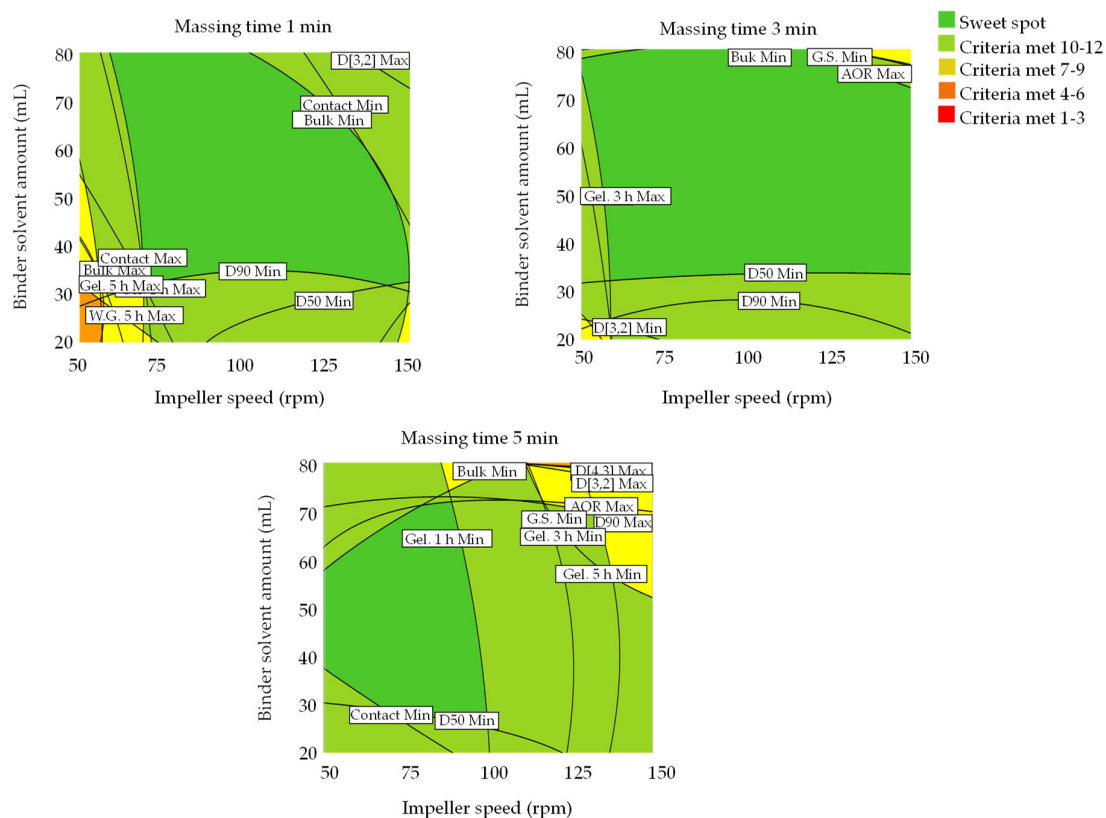

**Figure S2.** Sweet spot plot of high-shear wet granulation process for metformin HCl layer. W.G., tablet weight gain; Gel., tablet gel strength; Contact, tablet contact angle; G.S., granule strength; AOR, angle of repose; Bulk, bulk density.

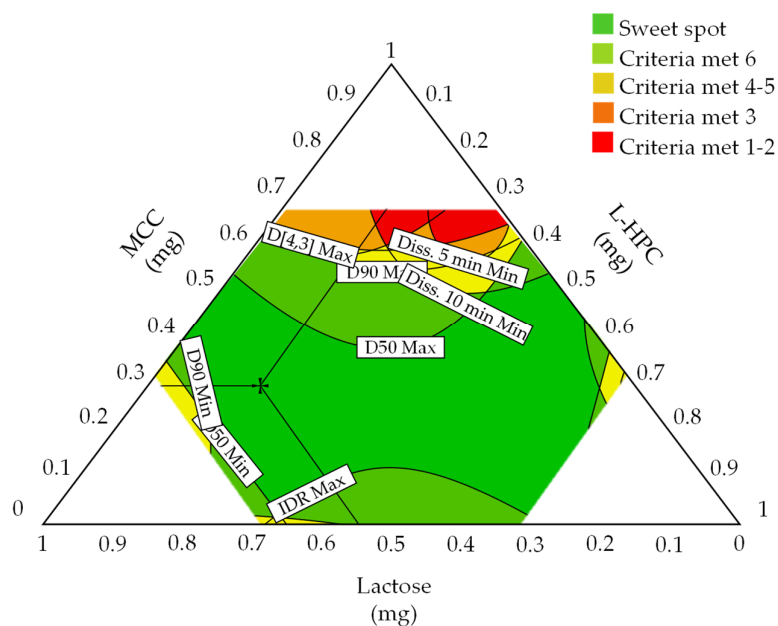

**Figure S3.** Sweet spot plot of formulation development for dapagliflozin L-proline layer. Diss., dissolution; IDR, intrinsic dissolution rate.

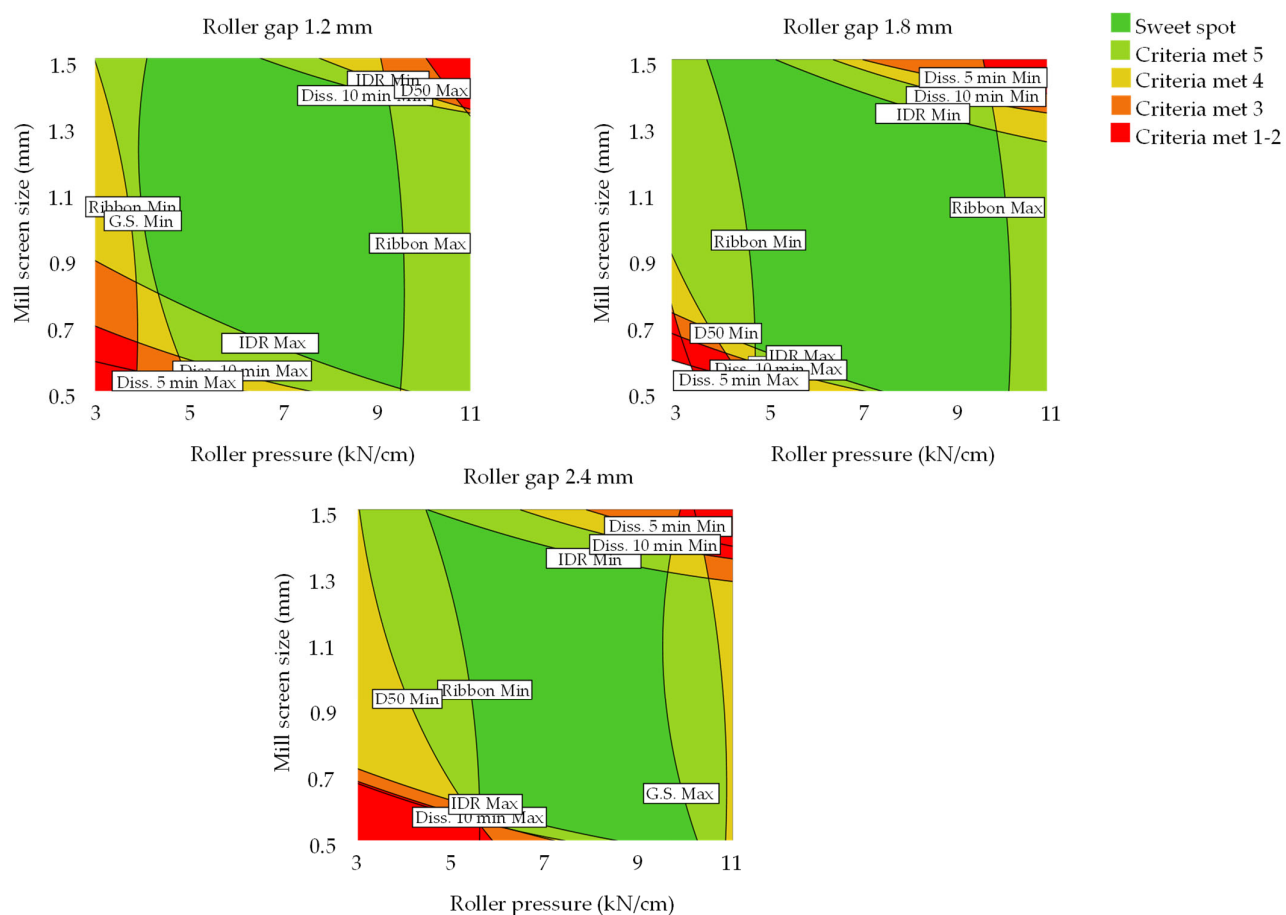

**Figure S4.** Sweet spot plot of roller compaction process for dapagliflozin L-proline layer. IDR, intrinsic dissolution rate; G.S., granule strength; Diss., dissolution; Ribbon, ribbon density.
